# Supplementary material for: Genome-wide analysis of complex wheat gliadins, the dominant carriers of celiac disease epitopes
Source: PubMed Central journal article supplement (PMC5353739; doi:10.1038/srep44609), 2017-03-16
Supplement: srep44609-s1.pdf [file srep44609-s1.pdf]

## Supplementary Information

# Genome-wide analysis of complex wheat gliadins, the dominant carriers of celiac disease epitopes

Da-Wei Wang<sup>1,2,3,+</sup>, Da Li<sup>1,2,+</sup>, Junjun Wang<sup>1,2,+</sup>, Yue Zhao<sup>1</sup>, Zhaojun Wang<sup>1,2</sup>, Guidong Yue<sup>1</sup>, Xin Liu<sup>1</sup>, Huanju Qin<sup>1</sup>, Kunpu Zhang<sup>1</sup>, Lingli Dong<sup>1</sup> & Daowen Wang<sup>1,2,4</sup>

<sup>1</sup>The State Key Laboratory of Plant cell and Chromosome Engineering, Institute of Genetics and Developmental Biology, Chinese Academy of Sciences, Beijing, China. <sup>2</sup>University of Chinese Academy of Sciences, Beijing, China. <sup>3</sup>Tobacco Research Institute, Chinese Academy of Agricultural Sciences, Qingdao, China. <sup>4</sup>The Collaborative Innovation Center for Grain Crops, Henan Agricultural University, Zhengzhou, China.

<sup>+</sup>These authors contributed equally to this work.

**Corresponding authors:** Kunpu Zhang (kpzhang@genetics.ac.cn), Lingli Dong (lldong@genetics.ac.cn) & Daowen Wang (dwwang@genetics.ac.cn).

**Figure S1.** Transcript levels of 25  $\alpha$ -gliadin genes (*Gli- $\alpha$ 1* to *- $\alpha$ 25*) in the developing grains of Xiaoyan 81 at 0, 10, 15 and 25 days after flowering (DAF). The 25 genes came from the A, B or D genome of common wheat. The transcript level was expressed as reads per kilobase per million mapped reads (RPKM).

**Figure S2.** Amino acid sequence comparison of 25  $\alpha$ -gliadins (*Gli- $\alpha$ 1* to *- $\alpha$ 25*). The deduced protein sequences were aligned using Clustal Omega (<http://www.ebi.ac.uk/Tools/msa/clustalo/>) with manual adjustment. The 25  $\alpha$ -gliadins shared a common primary structure composed of a signal peptide (SP), a N-terminal repetitive region (NRR), two poly-glutamine regions (PQR1 and PQR2), and two unique regions (UR1 and UR2). The six conserved cysteine residues are marked in red. The additional cysteine found in *Gli- $\alpha$ 25* is boxed in purple. The CSTT element shared by *Gli- $\alpha$ 8* to *- $\alpha$ 19* is shaded in yellow. The amino acid substitutions, which are unique to CSTT  $\alpha$ -gliadins and located in PQR1 and UR1, respectively, are also shaded in yellow.

**Figure S3.** Transcript levels of 11  $\gamma$ -gliadin genes (*Gli- $\gamma$ 1* to *- $\gamma$ 11*) in the developing grains of Xiaoyan 81 at 0, 10, 15 and 25 days after flowering (DAF). The 11 genes resided in the A, B or D genome of common wheat. The transcript level was expressed as reads per kilobase per million mapped reads (RPKM).

**Figure S4.** Amino acid sequence comparison of 11  $\gamma$ -gliadins (*Gli- $\gamma$ 1* to *- $\gamma$ 11*). The protein sequences were aligned using Clustal Omega with manual adjustment. The 11  $\gamma$ -gliadins possessed a common primary structure consisted of a signal peptide (SP), a N-terminal region (NR), a repetitive region (RR), two unique regions (UR1 and UR2), and a poly-glutamine region (PQR). These five regions have also been designated as I (NR), II (RR), III (UR1), IV (PQR) and V (UR2) by past studies<sup>40,41</sup>. The eight conserved cysteine residues are marked in red. The extra cysteine found in the repetitive region of *Gli- $\gamma$ 5* or *Gli- $\gamma$ 10* is boxed in purple.

**Figure S5.** Analysis of the transcript level of *Gli- $\delta$ 1* and its deduced protein. **a** Transcript level of *Gli- $\delta$ 1*, expressed as reads per kilobase per million mapped reads (RPKM), in the developing grains of Xiaoyan 81 at 0, 10, 15 and 25 days after flowering (DAF). This gene was located in the D genome of common wheat. **b** comparison of *Gli- $\delta$ 1* with two representative homologous proteins (*Gli- $\delta$ -CS1B* and *Gli- $\delta$ -CS1D*) from the common wheat variety Chinese Spring (CS). The three proteins

shared a common primary structure composed of a signal peptide (SP), a N-terminal region (NR), a repetitive region (RR), and a C-terminal region (CR). The eight conserved cysteines are labelled in blue. Gli- $\delta$ -CS1B and Gli- $\delta$ -CS1D were characterized by two previous studies<sup>28,29</sup>.

**Figure S6.** Transcript levels of five  $\omega$ -gliadin genes (*Gli- $\omega$ 1* to *- $\omega$ 5*) in the developing grains of Xiaoyan 81 at 0, 10, 15 and 25 days after flowering (DAF). The transcript level was expressed as reads per kilobase per million mapped reads (RPKM). The five genes resided in the A, B or D genome of common wheat.

**Figure S7.** Analysis of the five deduced  $\omega$ -gliadins (*Gli- $\omega$ 1* to *- $\omega$ 5*) of Xiaoyan 81. **a** Comparison of *Gli- $\omega$ 1*, *- $\omega$ 4* and *- $\omega$ 5* to two previously published homologous  $\omega$ -gliadins with the N-terminus starting by AREL or ARQL (GenBank accessions AAT74547 and CAR82268, respectively). **b** Comparison of *Gli- $\omega$ 3* to a representative homologous  $\omega$ -gliadin with the N-terminus starting by SPLL (GenBank accession BAE20328). **c** Comparison of *Gli- $\omega$ 2* to a previously reported D-type glutenin protein (GenBank accession AJ937839). In the above comparisons, the putative signal peptide is marked in blue, and the first four residues in the N-terminus (AREE, ARQL SPLL or ARPL) are written in brown. The cysteine residue found in *Gli- $\omega$ 2* or *Gli- $\omega$ 5* is boxed in purple. Asterisks indicate identical residues, whereas colons and periods represent conserved and semi-conserved substitutions, respectively.

**Figure S8.** Examination of the MALDI-TOF-MS peaks of Xiaoyan 81 gliadin extract. **a** The 10 compound MALDI-TOF-MS peaks of Xiaoyan 81 gliadin extract in the mass range of 25 - 45 kD. **b** Overlapping between the main MALDI-TOF-MS peaks of the gliadin extracts of Xiaoyan 81 (blue) and Chinese Spring (red). **c** Chromosomal control of the 10 main gliadin MS peaks as investigated using Chinese Spring (CS) and derivative nulli-tetrasomic (NT) lines lacking chromosome 1A (N1AT1D), 1B (N1BT1D), 1D (N1DT1A), 6A (N6AT6D), 6B (N6BT6A) or 6D (N6DT6B). The gliadin MS peak(s) missed in each of the six NT lines is indicated by red arrow(s).

**Figure S9.** Analysis of the six *Gli* locus deletion lines of Xiaoyan 81 using microsatellite markers. The deletion of the chromosomal fragment carrying *Gli-A1*, *-B1*, *-D1*, *-A2*, *-B2* or *-D2* in the six lines (DL*GliA1*, DL*GliB1*, DL*GliD1*, DL*GliA2*, DL*GliB2* and DL*GliD2*) was investigated using chromosome specific microsatellite

markers. The total number of markers used was five (1AS), four (1BS), six (1DS), eight (6AS), seven (6BS) or six (6DS). The markers missed in the deletion lines are indicated by red arrows, whereas those still detectable are labeled by green arrows. The unlabeled markers were not examined. The genetic positions of the markers (cM) are provided on the left side of each graph. The linkage data of the markers are from GrainGenes (<http://wheat.pw.usda.gov/ggpages/SSRclub/GeneticPhysical/>).

**Figure S10.** Grains harvested from Xiaoyan 81 and the six *Gli* locus deletion lines. Xiaoyan 81 and the *Gli* locus deletion lines (DLGliA1, DLGliB1, DLGliD1, DLGliA2, DLGliB2 and DLGliD2) were cultivated in the field. The grains shown are typical of the harvests from four field environments conducted in 2013 to 2016.

**Figure S11.** A typical 2-DE gel image of Xiaoyan 81 gliadin extract obtained by using the IPG strip with a linear pH gradient of 6-11 in the first dimension. The second dimension was run in 12% SDS-PAGE. The majority of the gliadin spots were well separated (see also insets). The spots in the two dash-line boxes were found to be LMW-GSs by subsequent MS/MS analysis. The size (kD) of the protein markers is indicated on the left side of the graph.

**Figure S12.** A representative 2-DE gel graph of Xiaoyan 81 gliadin extract generated by using the IPG strip with a linear pH gradient of 3-10 in the first dimension. The second dimension was conducted in 12% SDS-PAGE. The gliadin spots in the two boxes were better resolved than using the IPG strip with a linear pH gradient of 6-11 in the first dimension. The size (kD) of the protein markers is shown on the left side of the image.

**Figure S13.** A typical result of validating the location of gliadin genes in specific *Gli* loci by PCR mapping. The validation was carried out with gene specific primers and the genomic DNA samples of Xiaoyan 81 and the six *Gli* locus deletion lines (DLGliA1, DLGliB1, DLGliD1, DLGliA2, DLGliB2 and DLGliD2) lacking *Gli-A1*, *Gli-B1*, *Gli-D1*, *Gli-A2*, *Gli-B2* and *Gli-D2*, respectively. The gliadin genes validated were *Gli-γ1*, *Gli-ω2*, *Gli-α9* and *Gli-α20*. The lengths of the PCR amplicons for the four genes are indicated in the brackets. The size (bp) of the DNA markers is shown on the left side of the image.

**Figure S14.** Absence of CD epitopes in previously reported  $\delta$ -gliadins. The five

$\delta$ -gliadins were identified in Chinese Spring (Gli- $\delta$ -CS1B and Gli- $\delta$ -CS1D), Hereward (Gli- $\delta$ -He1) or *Aegilops tauschii* (Gli- $\delta$ -Aet1 and Gli- $\delta$ -Aet2) by two previous studies<sup>28,29</sup>. The GenBank accession numbers for Gli- $\delta$ -He1, Gli- $\delta$ -Aet1 and Gli- $\delta$ -Aet2 are HE819390, JX081265 and JX295577, respectively.

**Table S1.** Summary of the data of RNA sequencing experiment 3 (RSE3).

**Table S2.** Sequence information of the 52 gliadin genes transcribed in the grains of Xiaoyan 81.

**Table S3:** Analysis of mass spectrometry data obtained for the 82 gliadin spots of Xiaoyan 81 separated by 2-DE.

**Table S4.** Computation of coeliac disease (CD) epitopes in the 21  $\alpha$ -gliadins accumulated in Xiaoyan 81 mature grains.

**Table S5.** Computation of coeliac disease (CD) epitopes in the 11  $\gamma$ -gliadin, 1  $\delta$ -gliadin and 5  $\omega$ -gliadin proteins accumulated in Xiaoyan 81 mature grains.

**Table S6.** PCR primers used for microsatellite marker analysis of the six *Gli* locus deletion lines.

**Table S7.** PCR primers used for mapping the chromosomal locations of 17 gliadin genes.

Figure S1

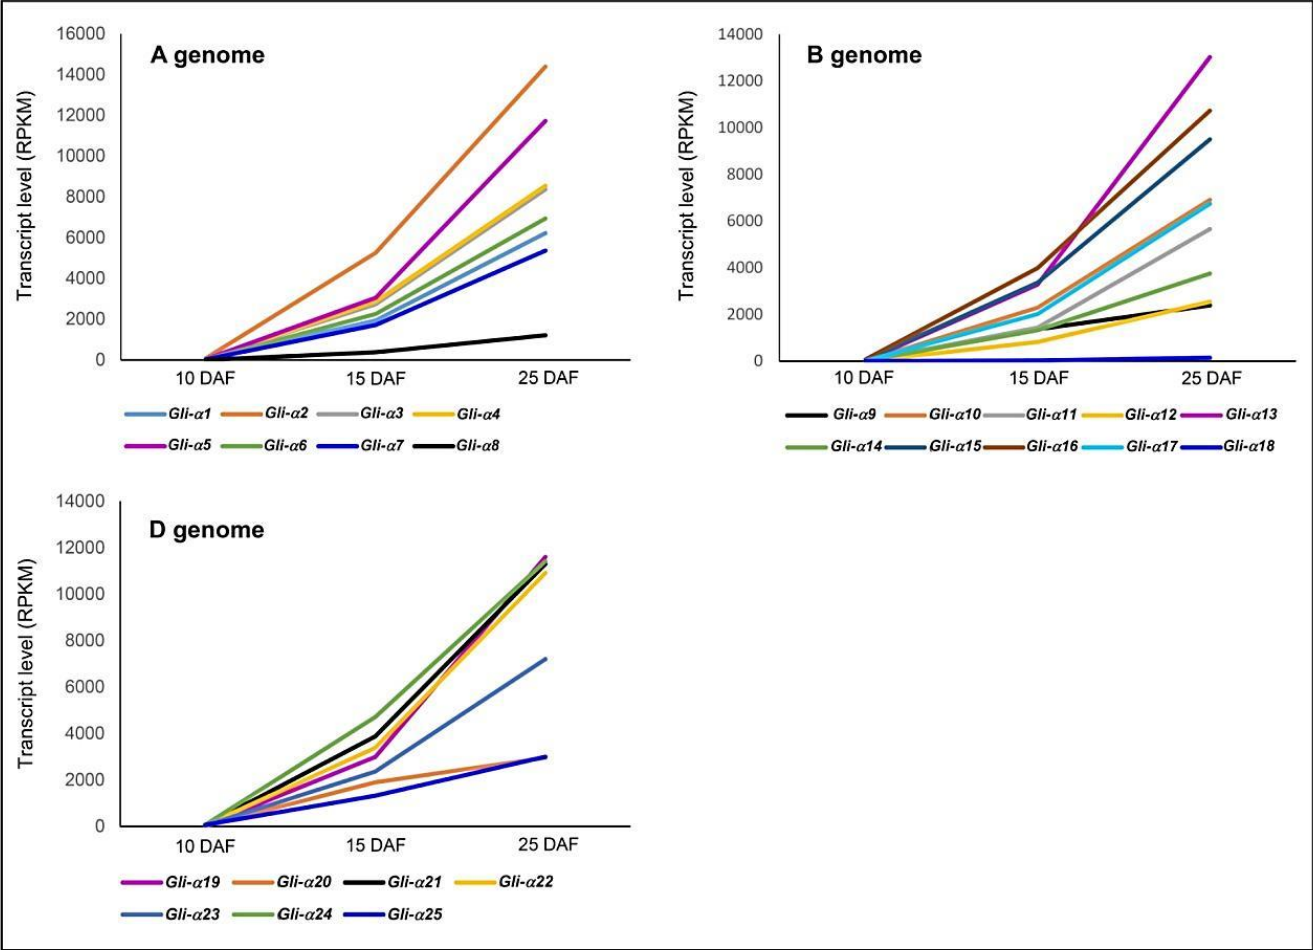





Figure S3

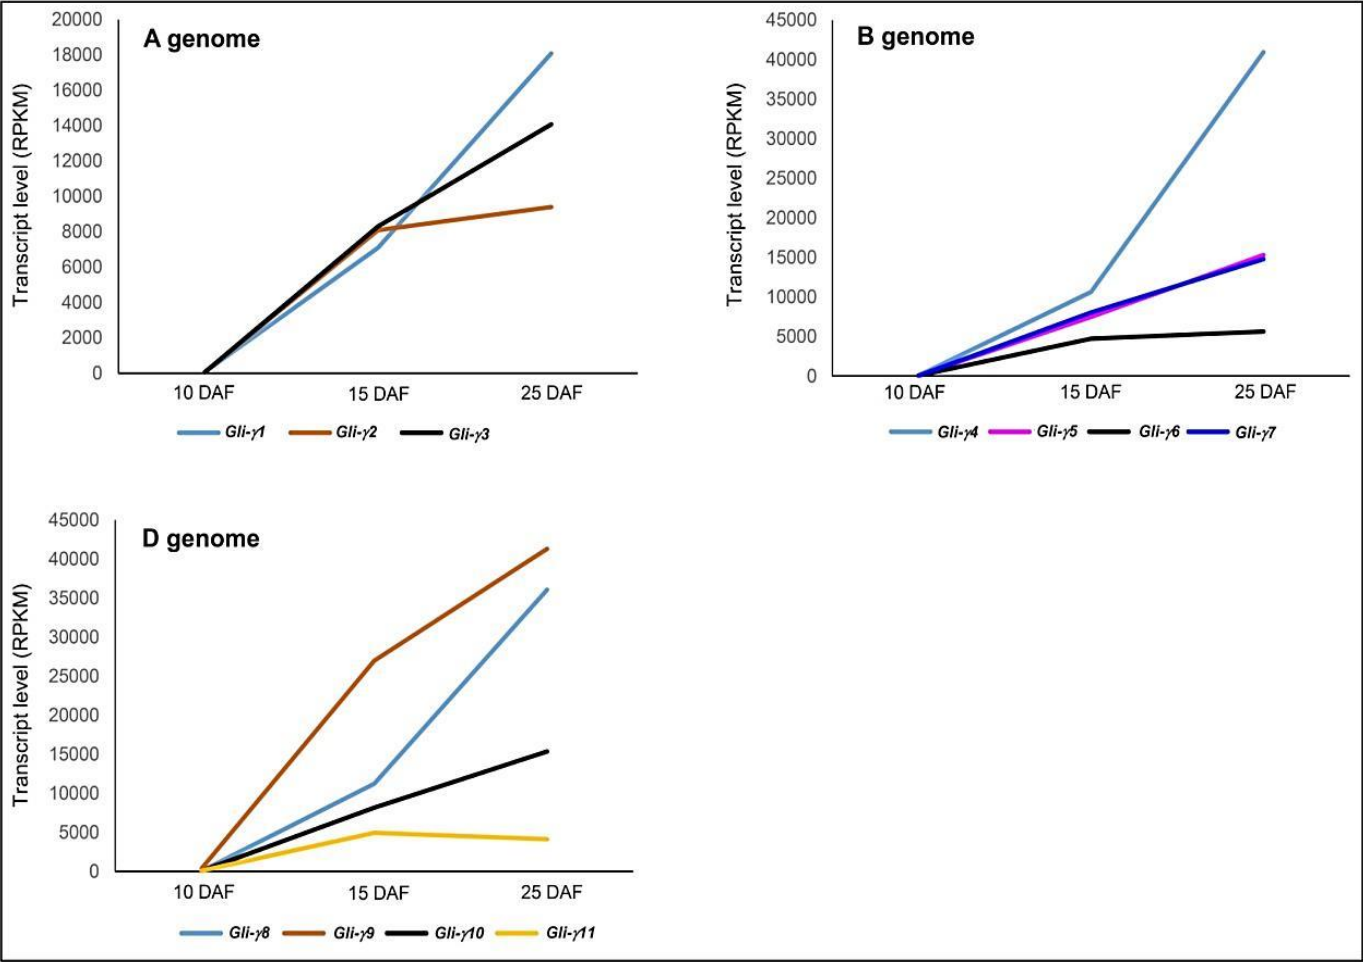





Figure S5

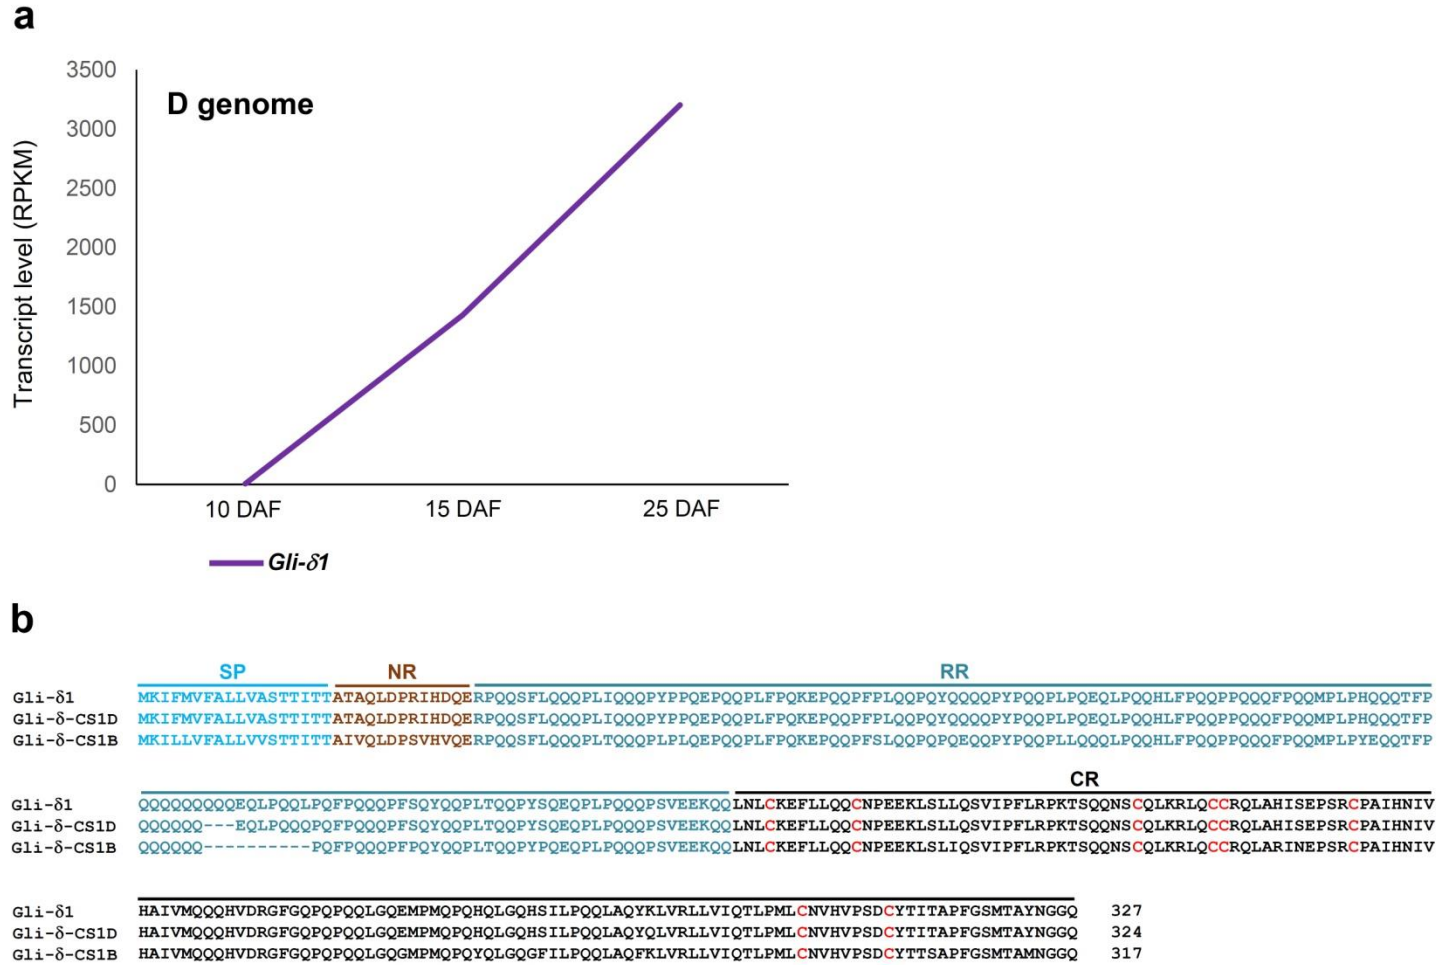

**Figure S6**

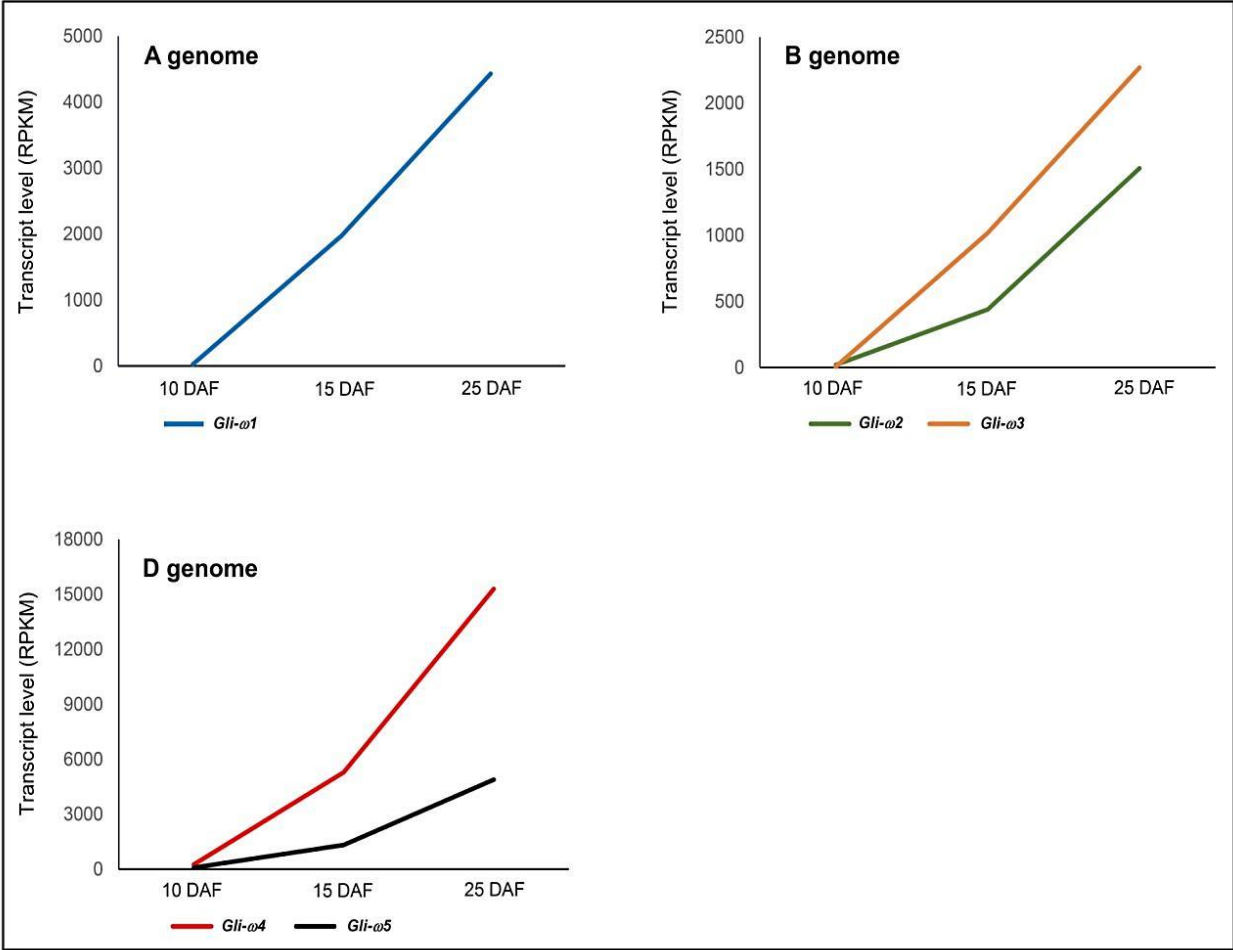





**Figure S8**

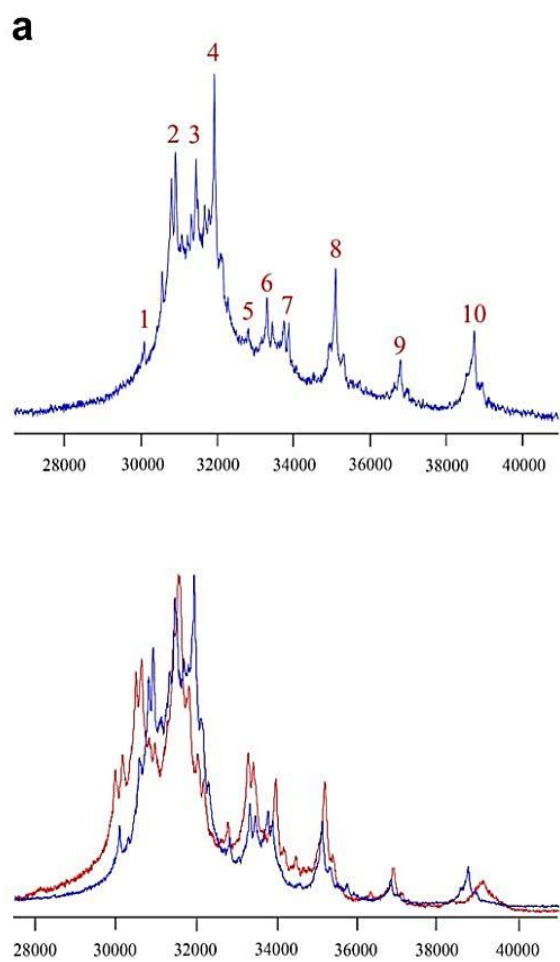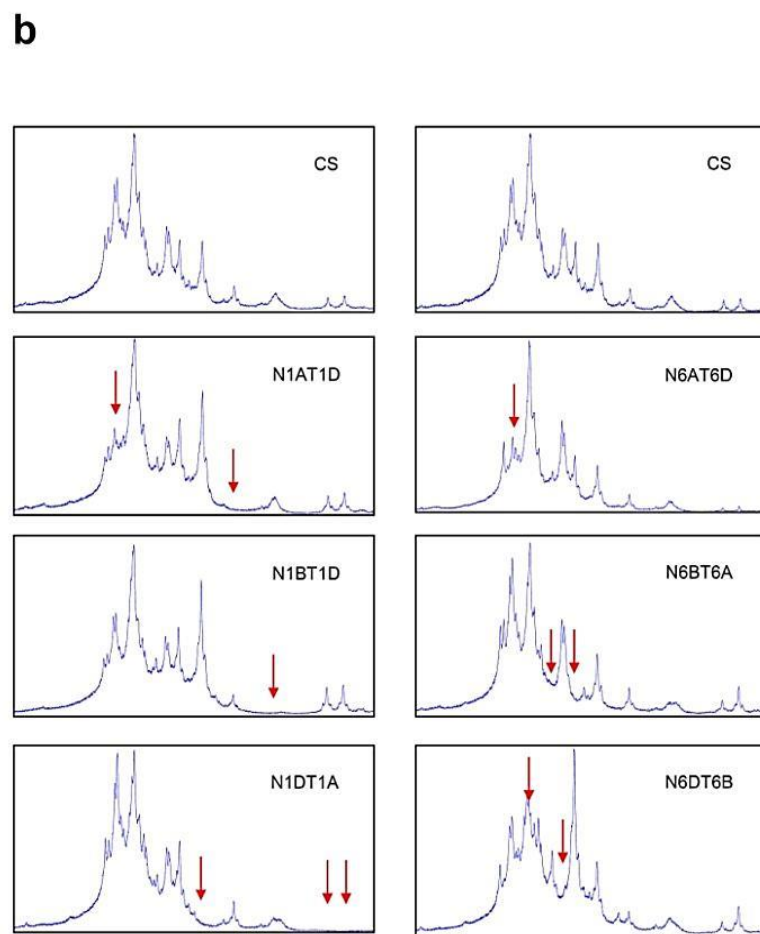

**Figure S9**

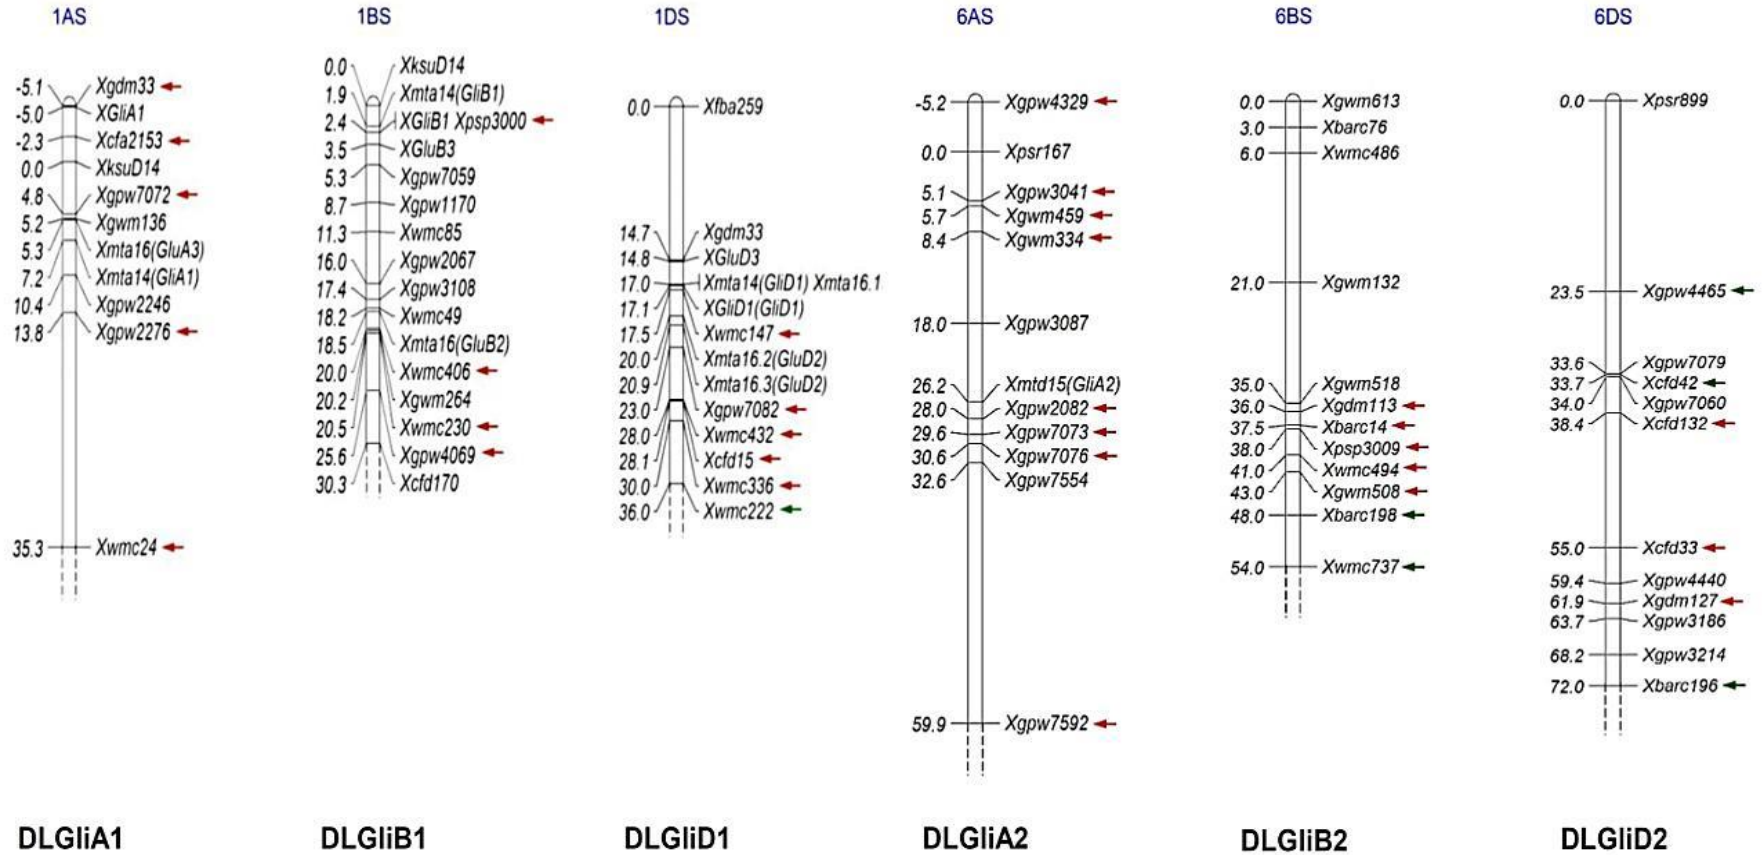



**Figure S10**

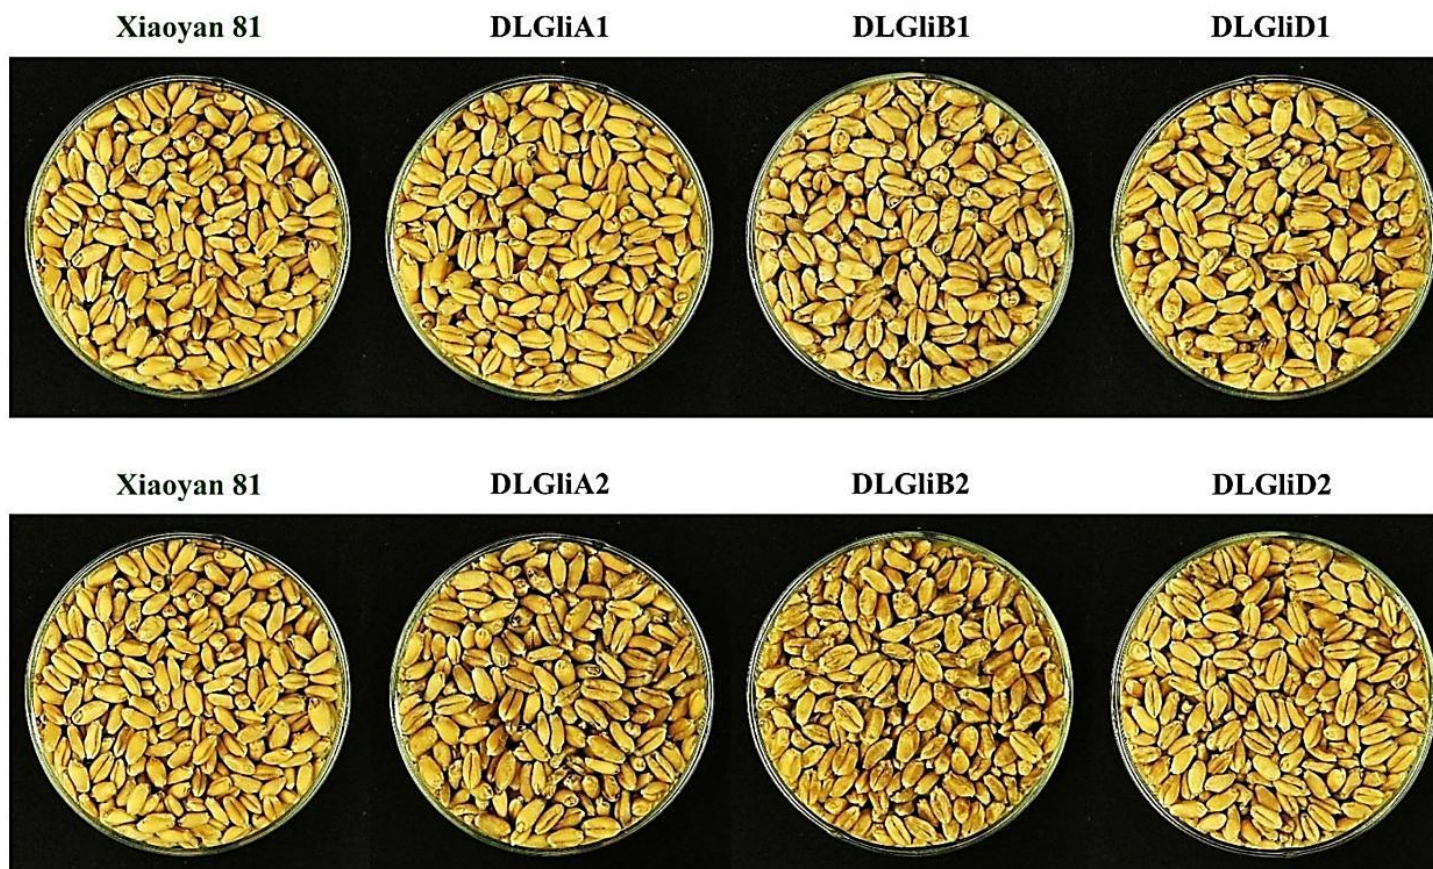

**Figure S11**

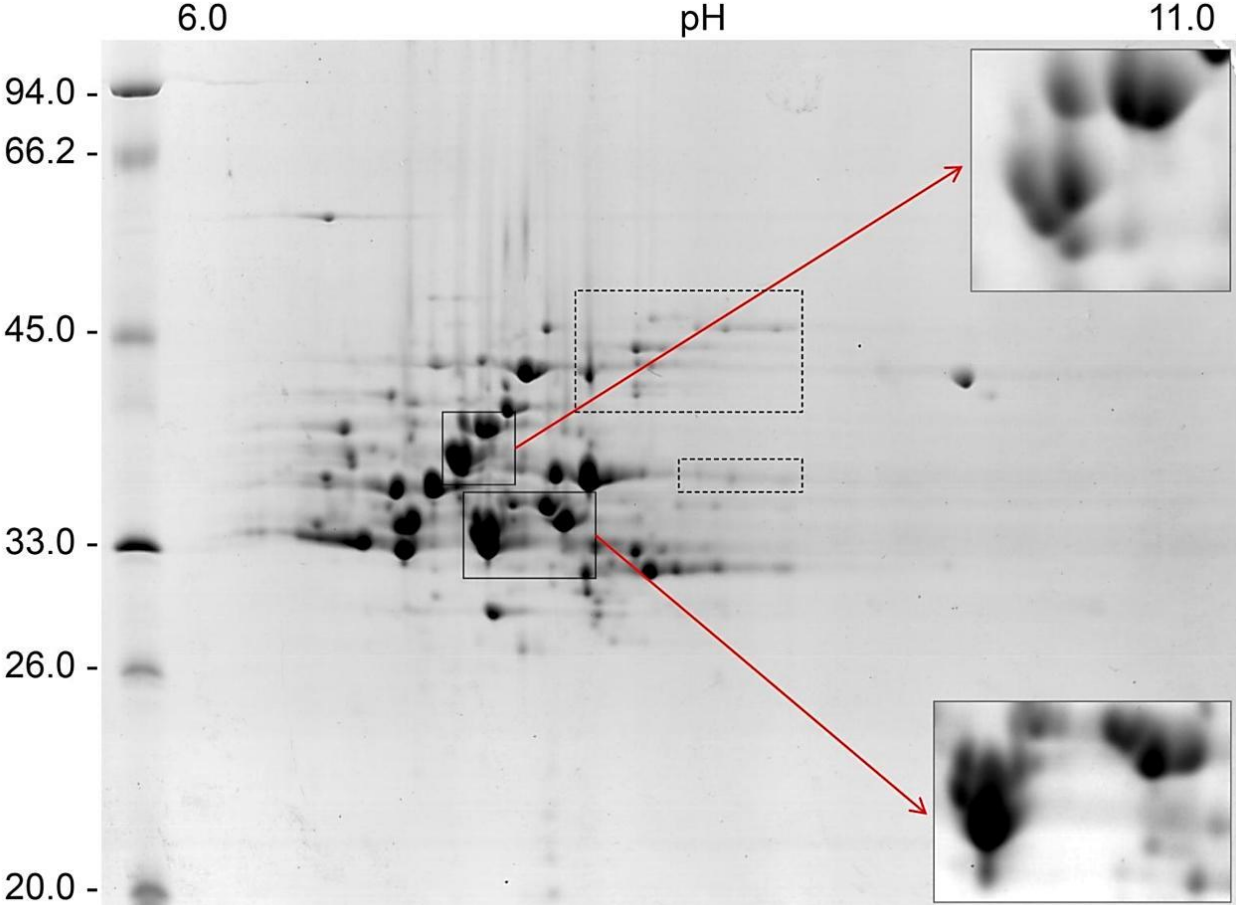

**Figure S12**

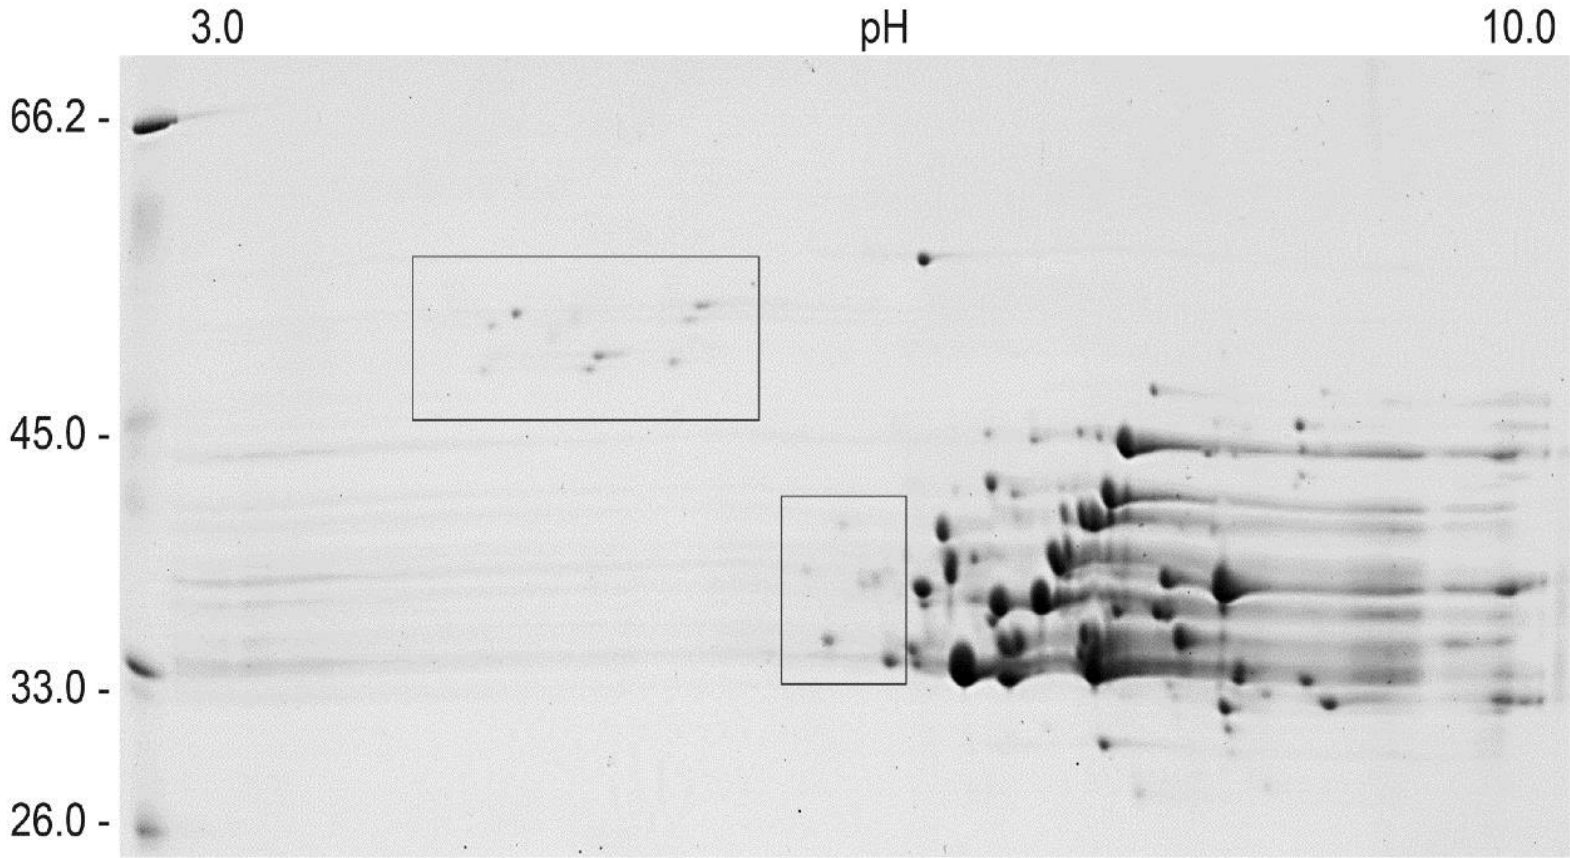

**Figure S13**

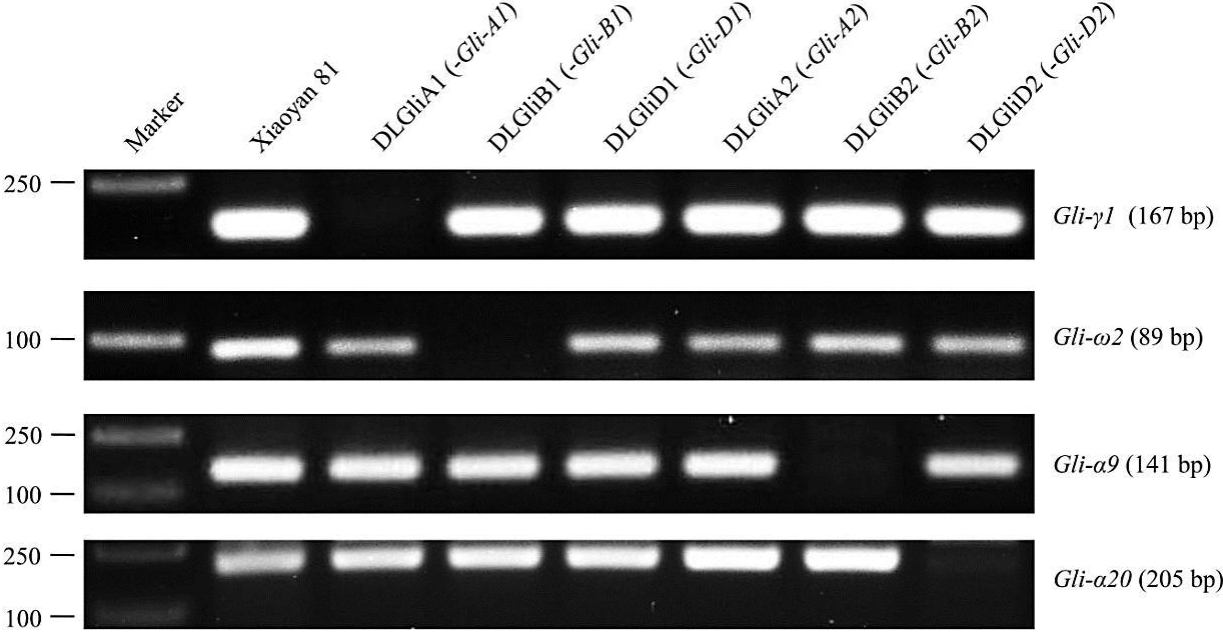

**Figure S14**

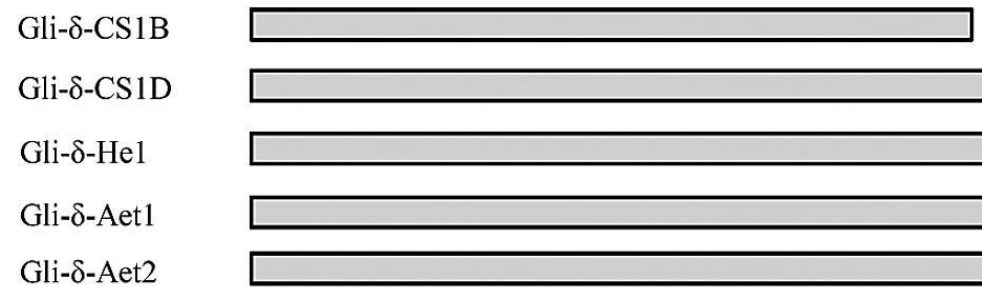

**Table S1.** Summary of the data of RNA sequencing experiment 3 (RSE3).

|                                                                       |                                    |
|-----------------------------------------------------------------------|------------------------------------|
| Number of cDNA library sequenced                                      | Three (1-2 kb, 2-3 kb, and > 3 kb) |
| Total number of full-length non-chimeric reads obtained               | 187,279                            |
| Total number of unique transcripts identified                         | 41,611                             |
| Number of transcripts mapped to Chinese Spring draft genome sequences | 35,380                             |
| Number of extant chromosomal loci covered                             | 14,747 (by 25,011 transcripts)     |
| Number of new chromosomal loci identified                             | 5,449 (by 10,369 transcripts)      |
| Total number chromosomal loci mapped                                  | 20,916                             |

Note: RSE3 was executed using the PacBio RSII platform. The three cDNA libraries sequenced were constructed with the RNA sample extracted from Xiaoyan 81 grains at 25 days after flowering.



**Table S2.** Sequence information of the 52 gliadin genes transcribed in the grains of Xiaoyan 81.

|                       | Sequence                                                                                                                                                                                                                                                                                                                                                                                                                                                                                                                                                                                                                                                                                                                                                                                                                                                                                                                                                                                                                                                                                                                                                                                                                                                                                                                                                                                                                                                                                                                                                                                                                                                                                                                                                                                                                                                                                                                                                                                                                                                                                                                                                                                                                                                                                                                                                                                                                                                                                                                      |
|-----------------------|-------------------------------------------------------------------------------------------------------------------------------------------------------------------------------------------------------------------------------------------------------------------------------------------------------------------------------------------------------------------------------------------------------------------------------------------------------------------------------------------------------------------------------------------------------------------------------------------------------------------------------------------------------------------------------------------------------------------------------------------------------------------------------------------------------------------------------------------------------------------------------------------------------------------------------------------------------------------------------------------------------------------------------------------------------------------------------------------------------------------------------------------------------------------------------------------------------------------------------------------------------------------------------------------------------------------------------------------------------------------------------------------------------------------------------------------------------------------------------------------------------------------------------------------------------------------------------------------------------------------------------------------------------------------------------------------------------------------------------------------------------------------------------------------------------------------------------------------------------------------------------------------------------------------------------------------------------------------------------------------------------------------------------------------------------------------------------------------------------------------------------------------------------------------------------------------------------------------------------------------------------------------------------------------------------------------------------------------------------------------------------------------------------------------------------------------------------------------------------------------------------------------------------|
| <b>Active members</b> | <p>1) Transcript and deduced protein sequences for 25 transcribed and intact <math>\alpha</math>-gliadin genes (each transcript sequence is provided from start to stop codons)</p> <p>&gt; <i>Gli-<math>\alpha</math>1</i> transcript (882 bp)<br/> ATGAAGACCTTTCTCATCCTTGCCCTCCTTGCTATCGTGGCGACCACCGCCACAACCTGCAGTTAGAGTTCCAGTGCCACAATTGCAGCCACAAA<br/> ATCCATCTCAGCAACAGCCACAAGAGCAAGTTCCGTTGGTACAACAACAACAATTTCTAGGGCAGCAACAACCATTTCCACCACAACAACCATA<br/> TCCACAGCCGCAACCATTTCCATCACAACAACCATATCTGCAACTGCAACCATTTCCGCAGCCGCAACTATCATATTCGCAGCCACAACCATTT<br/> CGACCACAACAACCATATCCACAACCGCAACCACAGTATTGCAACCACAACAACCAATTTACAGCAGCAGCAGCAGCAACAACAACAACAAC<br/> ACAACAACAACAACAACAACAACAACAACAACAAGAACAACAATCCTTCAACAAATTTTGCAACAACAACCTGATTCCATGCATGGATGTTGT<br/> ATTGCAGCAACACAACATAGCGCATGGAAGATCACAAGTTTTGCAACAAAGTACTTACCAGCTGTTGCAAGAATTGTGTTGTCAGCACCTATGG<br/> CAGATCCCTGAGCAGTCGCAGTGCCAGGCCATCCACAATGTTGTTTCATGCTATTATTCTGCATCAACAACAAAAACAACAACAACAACCATCGA<br/> GCCAGGTCTCCTTCCAACAGCCTCTGCAACAATATCCATTAGGCCAGGGCTCCTTCCGGCCATCTCAGCAAAAACCCACAGGCCAGGGCTCTGT<br/> CCAGCCTCAACAACCTGCCCCAGTTCGAGGAAATAAGGAACCTAGCGCTACAGACGCTACCTGCAATGTGCAATGTTTACATCCCTCCATATTGC<br/> ACCATGGCGCCATTTGGCATCTTCGGTACTAACTGA</p> <p>&gt; <i>Gli-<math>\alpha</math>1</i> deduced protein (293 aa)<br/> MKTFLILALLAIVATTATTAVRVPVPLQLPQNPSQQQPQEQVPLVQQQFLGQQQPFPPQQPYQPQPFPSQQPYLQLQPFPPQPLSYSQPQPF<br/> RPQQPYQPQPYSPQPPISQQQQQQQQQQQQQQQQQQQQQQEQQILQQILQQQLIPCMDVVLQQHNIAHGRSQVLLQSTYQLLQELCCQHLW<br/> QIPEQSQCQAIHNVVHAIILHQQKQQQQPSSQVSFQQPLQQYPLGQGSFRPSQQNPQAQGSVQPQQLPQFEEIRNLALQTLPAMCNVYIPPYC<br/> TMAPFGIFGTN*</p> <p>&gt; <i>Gli-<math>\alpha</math>2</i> transcript (882 bp)<br/> ATGAAGACCTTTCTCATCCTTGCCCTCCTTGCTATCGTGGCGACCACCGCCACAACCTGCAGTTAGAGTTCCAGTGCCACAATTGCAGCCACAAA<br/> ATCCATCTCAGCAACAGCCACAAGAGCAAGTTCCGTTGGTACAACAACAACAATTTCTAGGGCAGCAACAACCATTTCCACCACAACAACCATA<br/> TCCACAGCCGCAACCATTTCCATCACAACAACCATATCTGCAACTGCAACCATTTCCGCAGCCGCAACTATCATATTCGCAGCCACAACCATTT<br/> CGACCACAACAACCATATCCACAACCGCAACCACAGTATTGCAACCACAACAACCAATTTACAGCAGCAGCAGCAGCAACAACAACAACAAC<br/> ACAACAACAACAACAACAACAACAACAACAACAAGAACAACAATCCTTCAACAAATTTTGCAACAACAACCTGATTCCATGCATGGATGTTGT<br/> ATTGCAGCAACACAACATAGCGCATGGAAGATCACAAGTTTTGCAACAAAGTACTTACCAGCTGTTGCAAGAATTGTGTTGTCAGCACCTATGG<br/> CAGATCCCTGAGCAGTCGCAGTGCCAGGCCATCCACAATGTTGTTTCATGCTATTATTCTGCATCAACAACAAAAACAACAACAACAACCATCGA<br/> GCCAGGTCTCCTTCCAACAGCCTCTGCAACAATATCCATTAGGCCAGGGCTCCTTCCGGCCATCTCAGCAAAAACCCACAGGCCAGGGCTCTGT</p> |

CCAGCCTCAACAACCTGCCCCAGTTCGAGGAAATAAGGAACCTAGCGCTACAGACGCTACCTGCAATGTGCAATGTCTACATCCCTCCATATTGC  
 ACCATCGCGCCATTTGGCATCTTCGGTACTAACTGA

> *Gli- $\alpha$ 2* deduced protein (293 aa)  
 MKTFLILALLAIVATTATTAVRVPVPLQLPQNPSQQQPQEQVPLVQQQFLGQQQPFPPQQPYQPQPFPSQQPYLQLQPFPPQPQLSYSQPQPF  
 RPQQPYQPQPYQSQPQQPISQQQQQQQQQQQQQQQQQQQQQQEQQILQQILQQQLIPCMDVVLQQHNI AHGRSQVLQQSTYQLLQELCCQHLW  
 QIPEQSQCQAIHNVVHAIILHQQQKQQQQPSSQVVSFQQPLQQYPLGQGSFRPSQQNPQAQGSVQPQQLPQFEEIRNLALQTL PAMCNVYIPPYC  
 TIAPFGIFGTN\*

> *Gli- $\alpha$ 3* transcript (864 bp)  
 ATGAAGACCTTTCTCATCCTTGCCCTCCTTGCTATCGTGCGACCACCGCCACAACCTGCAGTTAGAGTTCCAGTGCCACAATTGCAGCCACAAA  
 ATCCATCTCAGCAACAGCCACAAGAGCAAGTTCATTGGTACAACAACAATTTCTAGGGCAGCAACAACCATTTCCACCACAACAACCATA  
 TCCACAGCCGCAACCATTTCCATCACAACAACCATATCTGCAGCTGCAACCATTTCCGCAGCCGCAACTACCATATTCACAGCCACAACCATTT  
 CGACCACAACAACCATATCCACAACCGCAACCACAGTATTCGCAACCACAACAACCAATTTTCACAGCAGCAGCAGCAGCAGCAACAACAACAAC  
 AACAACAACAACAACAACAACAACAATCCTTCAACAAATTTTGCAACAACAACCTGATTCCATGCATGGATGTTGTATTGCAGCAACAACAACAT  
 AGCGCATGGAAGATCACAAGTTTTGCAACAAGTACTTACCAGCTGCTGCAAGAATTGTGTTGTGTCAGCACCTATGGCAGATCCCTGAGCAGTCG  
 CAGTGCCAGGCCATCCACAATGTTGTTTCATGCTATTATTCTGCATCAACAACAACAACAACAACAACAACCATCGAGCCAGGTCTCCTTCCAAC  
 AGCCTCTGCAACAATATCCATTAGGCCAGGGCTCCTTCCGGCCATCTCAGCAAAACCCACAGGCCAGGGCTCTGTCCAGCCTCAACAACCTGCC  
 CCAGTTCGAGGAAATAAGGAACCTAGCGCTACAGACGCTACCTGCAATGTGCAATGTCTACATCCCTCCATATTGCACCATCGCGCCATTTGGC  
 ATCTTCGGTACTAACTGA

> *Gli- $\alpha$ 3* deduced protein (287 aa)  
 MKTFLILALLAIVATTATTAVRVPVPLQLPQNPSQQQPQEQVPLVQQQFLGQQQPFPPQQPYQPQPFPSQQPYLQLQPFPPQPQLPYSQPQPF  
 RPQQPYQPQPYQSQPQQPISQQQQQQQQQQQQQQQQQQQQQILQQILQQQLIPCMDVVLQQHNI AHGRSQVLQQSTYQLLQELCCQHLWQIPEQS  
 QCQAIHNVVHAIILHQQQKQQQQPSSQVVSFQQPLQQYPLGQGSFRPSQQNPQAQGSVQPQQLPQFEEIRNLALQTL PAMCNVYIPPYCTIAPFG  
 IFGTN\*

> *Gli- $\alpha$ 4* transcript (864 bp)  
 ATGAAGACCTTTCTCATCCTTGCCCTCCTTGCTATCGTGCGACCACCGCCACAACCTGCAGTTAGAGTTCCAGTGCCACAATTGCAGCCACAAA  
 ATCCATCTCAGCAACAGCCACAAGAGCAAGTTCATTGGTACAACAACAATTTCTAGGGCAGCAACAACCATTTCCACCACAACAACCATA  
 TCCACAGCCGCAACCATTTCCATCACAACAACCATATCTGCAGCTGCAACCATTTCTGCAGCCGCAACTACCATATTCACAGCCACAACCATTT  
 CGACCACAACAACCATATCCACAACCACAACCACAGTATTCGCAAGCACAACAACCAATTTTCACAGCAGCAGCAGCAGCAGCAACAACAACAAC  
 AACAACAACAACAACAACAACAACAATCCTTCAACAAATTTTGCAACAACAACCTGATTCCATGCATGGATGTTGTATTGCAGCAACAACAACAT  
 AGCCCATGGAAGATCACAAGTTTTGCAACAAGTACTTACCAGCTGCTGCAAGAATTGTGTTGTGTCAGCACCTATGGCAGATCCCTGAGCAGTCG  
 CAGTGCCAGGCCATCCACAATGTTGTTTCATGCTATTATTCTGCATCAACAACAACAACAACAACAACCATCGAGCCAGGTCTCCTTCCAAC

AGCCTCTGCAACAATATCCATTAGGCCAGGGCTCCTTCCGGCCATCTCAGCAAAACCCACAGGCCAGGGCTCTGTCCAGCCTCAACAACCTGCC  
CCAGTACGAGGAAATAAGGAACCTAGCGCTACAGACGCTACCTGCAATGTGCAATGTCTACATCCCTCCATATTGCACCATCGCGCCATTTGGC  
ATCTTCGGTACTAACTGA

> Gli- $\alpha$ 4 deduced protein (287 aa)

MKTFLILALLAIVATTATTAVRVPVPLQVPLVQQQFLGQQQPFPPQQPYQPQPFPSQQPYLQLQPFLLQPLPYSQPQPF  
RPQQPYQPQPYQSQAQQPISQQQQQQQQQQQQQQQQQQQILQQILQQQLIPCMDVVLQQHNIHGRSQVLLQQSTYQLLQELCCQHLWQIPEQS  
QCQAIHNVVHAIILHQQQKQQQQPSSQVSVFQQPLQQYPLGQGSFRPSQQNPQAQGSVQPPQLPQYEEIRNLALQTLPAMCNVYIPPYCTIAPFG  
IFGTN\*

> Gli- $\alpha$ 5 transcript (861 bp)

ATGAAGACATTTCTCATCCTTGCCCTCCTTGCTATTGTGGCGACCACCGCCACAACCTGCAGTTAGAGTTCCAGTGCCACAATTGCAGCCACAAA  
ATCCATCTCAGCAACAGCCACAAGAGCAAGTTCCATTGGTACAACAACAATTTCTAGGGCAGCAACAACCATTTCCACCACAACAACCATA  
TCCACAGCCGCAACCATTTCCATCACAACAACCATATCTGCAGCTGCAACCATTTCCGCAGCCGCAACTACCATATTCGCAGCCACAACCATTT  
CGACCACAACAACCATATCCACAACCGCAACCACAGTATTTCGCAACCACAACAACCAATTTTCACAGCAGCAGCAGCAGCAGCAACAACAACAAC  
ACAACAACAACAAGAACAACAATCCTTCAACAATTTTGCAACAACAACCTGATTCCATGCATGGATGTTGTATTGCAGCAACAACAACCTTAGC  
GCATGGAAGATCACAAGTTTTGCAACAAGTACTTACCAGCTGTTGCAAGAATTGTGTTGTCAGCACCTATGGCAGATCCCTGAGCAGTCGCAG  
TGCCAGGCCATCCACAATGTTGTTTCATGCTATTATTCTGCATCAACAACAACAAGCAACAACAACAACCTATCGAGCCAGGTCTCCTTCCAACAGC  
CTCAGCAACAATATCCATTAGGCCAGGGCTCCTTCCGGCCATCTCAGCAAACTCACAGGCCAGGGCTCTGTCCAGCCTCAACAACCTGCCCCA  
GTTTCGAGGAAATAAGGAACCTAGCGCTACAGACCCTACCTGCAATGTGCAATGTCTACATCCCTCCATATTGCACCATCGCGCCATTTGGCATC  
TTCGGTACTAAATGA

> Gli- $\alpha$ 5 deduced protein (286 aa)

MKTFLILALLAIVATTATTAVRVPVPLQVPLVQQQFLGQQQPFPPQQPYQPQPFPSQQPYLQLQPFLLQPLPYSQPQPF  
RPQQPYQPQPYQSQPQQPISQQQQQQQQQQQQQQQQQQEQQILQQILQQQLIPCMDVVLQQHNLHGRSQVLLQQSTYQLLQELCCQHLWQIPEQSQ  
CQAIHNVVHAIILHQQQKQQQQLSSQVSVFQQPQQQYPLGQGSFRPSQQNSQAQGSVQPPQLPQFEEIRNLALQTLPAMCNVYIPPYCTIAPFGI  
FGTK\*

> Gli- $\alpha$ 6 transcript (870 bp)

ATGAAGACATTTCTCATCCTTGCCCTCCTTGCTATCGTGGCGACCACCGCCACAATGCAGTTAGAGTTCCAGTGCCACAATTGCAGCCACAAA  
ATCCATCTCAGCAACAGCCACAAGAGCAAGTTCCATTGGTACAACAACAATTTCTAGGGCAGCAACAACCATTTCCACCACAACAACCATA  
TCCACAGCCGCAACCATTTCCATCACAACAACCATATCTGCAGCTGCAACCATTTTCGCAGCCGCAACTACCATATTCGCAGCCACAACCATTT  
CGACCACAACAACCATATCCACAACCGCAACCACAGTATTTCGCAACCACAACAACCAATTTTCACAGCAGCAGCAGCAGCAGCAACAACAACAAC  
ACAACAACAACAACAACAAGAACAACAATCCTTCAACAATTTTGCAACAACAACCTGATTCCATGCATGGATGTTGTATTGCAGCAACA  
CAACATAGCGCGTGAAGATCACAAGTTTTGCAACAAGTACTTACCAGCTGTTGCAAGAATTGTGTTGTCAGCACCTATGGCAGATCCCTGAG

AAGTTGCAGTGCCAGGCCATCCACAATGTTGTTTCATGCTATTATTCTGCATCAACAACAAAAACAACAACAACACTATCGAGCCAGGTCTCCT  
TCCAACAGCCTCAGCAACAATATCCATTAGGCCAGGGCTCCTTCCGGCCATCTCAGCAAAACCCACAGGCCAGGGCTCTGTCCAGCCTCAACA  
ACTGCCCCAGTTCGAGGAAATAAGGAACCTAGCGCTACAGACGTTACCTGCAATGTGCAATGTCTACATCCCTCCATATTGCACCATCGCGCCA  
TTTGGCATCTTCGGTACTAATTGA

> Gli- $\alpha$ 6 deduced protein (289 aa)

MKTFLILALLAIIVATTATNAVRVPVPLQVPLVQQQFLGQQQPFPPQQPYQPQPFPSQQPYLQLQPFPSQPQLPYSQPQPF  
RPQQPYQPQPYSPQQPISQQQQQQQQQQQQQQQQQQQQEQIILQQILQQQLIPCMDVVLQQHNIARGRSQVLLQSTYQLLQELCCQHLWQIPE  
KLQCQAIHNVVHAIILHQQQKQQQQQLSSQVVSFQQPQQQYPLGQGSFRPSQQNPQAQGSVQPPQLPQFEEIRNLALQTLPAMCNVYIPPYCTIAP  
FGIFGTN\*

> Gli- $\alpha$ 7 transcript (864 bp)

ATGAAAACCTTTCTCATCCTTGCCCTCCTTGCTATCGTGGCGACCACCGCCACAACACTGCAGTTAGAGTTCAGTGCCACAATTGCAGCCACAAA  
ATCCATCTCAGCAACAGCCACAAGAGCAAGTTCATTGGTACAACAACAATTTCTAGGGCAGCAACAACCATTTCCACCACAACAACCATA  
TCCACAGCCGCAACCATTTCCATCACAACAACCATATCTGCAACTGCAACCATTTCTGCAGCCGCAACTACCATATTCACAGCCACAACCATTT  
CGACCACAACAACCATATCCACAACCGCAACCACAGTATTGCAACCACAACAACCAATTTTCACAGCAGCAGCAGCAGCAGCAGCAACAACAAC  
ACAACAACAACAACAACAACAACAATCATTCAACAATTTTGCAACAACAACACTGATTCCATGCATGGATGTTGTATTGCAGCAACAACAACAT  
AGTGCATGGAAAATCACAAGTTTTGCAACAAAAGTACTTACCAGCTGCTGCAAGAATTGTGTTGTCAGCACCTATGGCAGATCCCTGAGCAGTCG  
CAGTGCCAGGCCATCCACAATGTTGTTTCATGCTATTATTCTGCATCAACAACAAAAACAACAACAACCATCGAGCCAGGTCTCCTTCCAAC  
AGCCTCTGCAACAATATCCATTAGGCCAGGGCTCCTTCCGGCCATCTCAGCAAAACCCACAGGCCAGGGCTCTGTCCAGCCTCAACAACCTGCC  
CCAGTTCGAGGAAATAAGGAACCTAGCCCTACAGACGCTACCTGCAATGTGCAATGTCTACATCCCTCCATATTGCACCATCGCGCCATTTGGC  
ATCTTCGGTACTAACTGA

> Gli- $\alpha$ 7 deduced protein (287 aa)

MKTFLILALLAIIVATTATTAVRVPVPLQVPLVQQQFLGQQQPFPPQQPYQPQPFPSQQPYLQLQPFPLQVPLPQLPYSQPQPF  
RPQQPYQPQPYSPQQPISQQQQQQQQQQQQQQQQQQQQIQQIILQQQLIPCMDVVLQQHNIHVHGSQVLLQSTYQLLQELCCQHLWQIPEQS  
QCQAIHNVVHAIILHQQQKQQQQPSSQVVSFQQPQQYPLGQGSFRPSQQNPQAQGSVQPPQLPQFEEIRNLALQTLPAMCNVYIPPYCTIAPFG  
IFGTN\*

> Gli- $\alpha$ 8 transcript (891 bp)

ATGAAGACCTTTCTCATCCTTGCCCTCCTTGCTATCGTGGCGACCACCGCCACAACACTGCAGTTAGAGTTCAGTGCCACAACCGCAGCCACAAA  
ATCCATCTCAGCCACAGCCACAAGGGCAAGTTCATTGGTACAACAACAACAATTTCCAGGGCAGCAACAACAATTTCCACCACAACAGCCATA  
TCCGAGCCGCAACCATTTCCATCACAACAACCATATCTGCAATTGCAACCATTTCCACAACCGCAACCATTTCCGCCACAACACTACCATATCCG  
CAGCCACCACCATTTTACCACAACAACCATATCCACAACCGCAACCACAGTATCCGCAACCACAACAACCAATTTTCACAGCAACAAGCACAAC  
ACAACAACAACAACAACAACAACAGCAACAACAACAACAACAACAATCCTTCAACAATTTTGCAACAACAACACTGATTCCATGCAGGGA

TGTTGTCTTGCAACAACACAACATAGCGCATGCAAGATCACAAGTTTTGCAACAAAGCACTTACCAGCCATTGCAACAATTGTGTTGTCAACAG  
CTGTGGCAGATCCCCGAGCAGTCGCGGTGCCAAGCCATCCACAATGTTGTTTCATGCTATTATTCTGCATCAACAACAGCGACAACAACACCAT  
CGAGCCAGGTCTCCTTGCAACAGCCTCAGCAACAATATCCATCAGGTGAGGGCTTCTTCCAGCCATCTCAGCAAACCCACAGGCCAGGGCTC  
TGTTCAACCTCAACAATTGCCCCAGTTGCGAGAAATAAGGAACCTAGCGCTACAGACACTACCTAGAATGTGCAATGTCTATATCCCTCCATAT  
TGCTCGACCACCATTGCGCCATTTGGCATCTTCGGTACTAACTGA

>Gli- $\alpha$ 8 deduced protein (296 aa)

MKTFLILALLAIVATTATTAVRVPVPPQPQNPSPQPQGVPLVQQQVFPQQQVFPQQPYPPQPPFSSQPYLQLQPFPPQPPFPPLPY  
QPPPFSPQPPYPPQPPQYPPQPPISQQQAQQQQQQQQQQQQQQQQQQIQQILQQQLIPCRDVLQQHNIHARSQVLQQSTYQPLQQLCCQQ  
LWQIPEQSRQAIHNVVHAIILHQQRQQQPSQVSLQQPQQYPSGQGFQPSQQNPQAQGSVQPPQLPQFEEIRNLALQTLPRMCNVYIPY  
CSTTIAPFGIFGTN\*

>Gli- $\alpha$ 9 transcript (978 bp)

ATGAAGACCTTTCTCATCTTCCCTCCTTGCTATCGTGGCGACCCTGCCACAACCTGCAGTTAGATTTCCAGTGCCACAATTGCAGCCGCAAA  
ATCCATCTCAGCAACAACCACAAGAGCAAGTCCGTTGGTGCAACAACCTACAATATCCAGGGCAACAACAACCATTTCCACCACAACAGCCATA  
TCCGCGAGCCGCAACCATTTCCATCACAACAACCATTTGCCGAACCGCAACCATTTCTGCCACAACCTACCATATCCGCAGCCACAACCATTTCCA  
CCACAACAACCATATCCACAACCGCAACCACAGTATCCGCAACCACAACAACCAATTTACAGCAACAAGCACAACAAGCACAACAACAACAAC  
ACAACAACAACAACAACAACAACAACAACAATCCTTCAACAATTTCTGCAACAACAACAACCTGATTCATGCAGGGATGTCGTCCTTGCAACAACA  
CAACATAGCGCATGCAAGCTCACAAGTATTGCAACAAGTAGTTACCAACTGTTGCAACAATTATGTTGTCAACGTTTGTGGCAGATCCCCGAG  
CAGTCGCGGTGCCAAGCCATCCACAATGTCGTTTCATGCTATTATTCTGCAACAACAACAACAACAACAACAACAACAACAACAACAACAACAAC  
ACAACAACAACAACAACAACAACAACAACAACAACAACAACAACAACAACAACAACAACAACAACAACAACAACAACAACAACAACAACAACA  
GGTCTCCTACCAGCAGCCTCAGCAACAATATCCATCGGGCCAGGGATCCTTCCAGCCATCTCAGCAGAACCACAGGCCAGGCCTCTGTCCAG  
CCTCAACAACCTCCCCAGTTGCGAGAAATAAGGAATCTAGCACGGCAGACGCTACCGGCAATGTGCAATGTCTACATCCCTCCATATTGCTCGA  
CCACCATTGCGCCATCTGGCATCTTTGGTACTAACTGA

>Gli- $\alpha$ 9 deduced protein (325 aa)

MKTFLILSLLAIVATTATTAVRFPVPLQVLPQNPSPQQPQEQVPLVQQQLQYPGQQVFPFPQQPYPPQPPFSSQPLPQPQPFLLPQLPYPPQPPFP  
PQQPYPPQPPQYPPQPPQYPPQPPISQQQAQQAQQQQQQQQQQQQQQQQQIQQILQQQLIPCRDVLQQHNIHASSQVLQQSSYQLLQQLCCQRLWQIPE  
QSRQAIHNVVHAIILQQQQQQQQQQQQQQQQQQQQQQQQQQQQQQQQQQQQQQQQQQQQQQQQQQQQQQQQQQQQQQQQQQQQQQQQQQQQ  
PQQQLPQFEEIRNLARQTLPAMCNVYIPPYCSTTIAPSGIFGTN\*

>Gli- $\alpha$ 10 transcript (900 bp)

ATGAAGACCTTTCTCATCTTGCCTCCTTGCTATCGTGGCGACCACCACCACAACCTGCAGTTAGAGTTCCAGTGCCACAATTGCAGCCACAAA  
ATCCATCTCAGCAACAACCACAAGAGCAAGTCCATTGGTGCAACAACAACAATTTCTAGGGCAGCAACAACAACAATTTCCAGGGCAACAACA  
ACCATTTCCACCACAACAGCCATATCCGCGAGCCGCAACCATTTCTGCCACAACCTACCATATCCGCAGCCGCAACCATTTCCACCACAACAATCA





ACCATTTCCACCACAACAGCCATATCCGCAGCCGCAACCATTTCTGCCACAACACTACCATATCCGCAGCCGCAACCATTTCCACCACAACAATCA  
TATCCACAACCACAACCACAATATCCGCACCACAACAACCAATTTTCGCAGCAACAAGCACAACACTACAACAACAACAACAACAACAACAAC  
ACAACAACAATCCTTCAACAAATTTCTGCAACAACAACCTGATTCCATGCAGGGATGTGCTCTTGAACAACCCAATATAGCACATGCAAGCTC  
ACAAGTATCGCAACAAAGTTACCAACTGTTGCAACAATTATGTTGTGTCAGCAACTGTGGCAGACCCCCGAGCAGTCACGGTGCCAAGCCATCCAC  
AATGTCATTCATGCTATTATTTTGCATCATCAACAACAACAACAACAACAACAACAACAACAACAACAACAACAACAACAACCGTTCGAGCCAGG  
TCTCCTACCAGCAGCCTCAGCAACAATATCCATCAGGCCAGGGCTTCTTCCAGCCATCTCAGCAAACCCACAGGCCAGGGCTTTGTCCAACC  
TCAGCAACTGCCGAGTTCGAGGAAATAAGGAACCTAGCGCTGCAGACGCTACCAGCAATGTGCAATGTCTACATCCCTCCATATTGCTCGACC  
ACCATTGCGCCATTTGGCATCATGAGTACTAACTGA

>Gli- $\alpha$ 12 deduced protein (293 aa)

MKTFLILALLAIIVATTTTTAVRVPVPLQLPQNPSQQQPQEQVPLVQQQFLGQQQQQFPGQQQFPFPQQPYQPQPFLPQLPYPQPQFPFPQQS  
YPQPQPYPQPQQPISQQQAQLQQQQQQQQQQQIILQQILQQQLIPCRDVLQQPNIHAHASSQVSQSYQLLQQLCCQQLWQTPEQSRCQAIH  
NVIHAIILHHQQQQQQQQQQQQQQQQPSSQVSYQQPQQQYPSGQGFQPSQQNPQAQGFVQPQQLPQFEEIRNLALQTLPAMCNVYIPPYCST  
TIAPFGIMSTN\*

>Gli- $\alpha$ 13 transcript (891 bp)

ATGAAGACCTTTCTCATCCTTGCCCTCCTTGCTATCGTGCCGACCACCACCACAACACTGCAGTTAGAGTTCAGTGCCACAATTGCAGCCACAAA  
ATCCATCTCAGCAACAACCACAAGAGCAAGTTCATTGGTGCAACAACAACAATTTCTAGGGCAGCAACAACAACAATTTCCAGGGCAACAACA  
ACCATTTCCACCACAACAGCCATATCCGCAGCCGCAACCATTTCTGCCACAACACTACCATATCCGCAGCCGCAACCATTTCCACCACAACAATCA  
TATCCACAACCACAACCACAATATCCGCACCACAACAACCAATTTTCGCAGCAACAAGCACAACACTACAACAACAACAACAACAACAACAAC  
ACAACAATCCTTCAACAAATTTCTGCAACAACAACCTGATTCCATGCAGGGATGTGCTCTTGAACAACCCAATATAGCACATGCAAGCTCACA  
AGTATCGCAACAAAGTTACCAACTGTTGCAACAATTATGTTGTGTCAGCAACTGTGGCAGACCCCCGAGCAGTCACGGTGCCAAGCCATCCACAAT  
GTCATTTCATGCTATTATTTTGCATCAACAACAACAACAACAACAACAACAACAACAACAACAACAACAACAACAACAACAACCGT  
CGAGCCAGGTCTCCTACCAGCAGCCTCAGCAACAATATCCATCAGGCCAGGGCTTCTTCCAGCCATCTCAGCAAACCCACAGGCCAGGGCTT  
TGTTCAACCTCAGCAACTGCCGAGTTCGAGGAAATAAGGAACCTAGCGCTGCAGACGCTACCAGCAATGTGCAATGTCTACATCCCTCCATAT  
TGCTCGACCACCATTGCGCCATTTGGCATCATGAGTACTAACTGA

>Gli- $\alpha$ 13 deduced protein (296 aa)

MKTFLILALLAIIVATTTTTAVRVPVPLQLPQNPSQQQPQEQVPLVQQQFLGQQQQQFPGQQQFPFPQQPYQPQPFLPQLPYPQPQFPFPQQS  
YPQPQPYPQPQQPISQQQAQLQQQQQQQQQQQIILQQILQQQLIPCRDVLQQPNIHAHASSQVSQSYQLLQQLCCQQLWQTPEQSRCQAIHN  
VIHAIILHQQQQQQQQQQQQQQQQQQQQPSSQVSYQQPQQQYPSGQGFQPSQQNPQAQGFVQPQQLPQFEEIRNLALQTLPAMCNVYIPPY  
CSTTIAPFGIMSTN\*

>Gli- $\alpha$ 14 transcript (891 bp)

ATGAAGACCTTTCTCATCCTTGCCCTCCTTGCTATCGTGCCGACCACCACCACAACACTGCAGTTAGAGTTCAGTGCCACAATTGCAGCCACAAA

ATCCATCTCAGCAACAACCACAAGAGCAAGTTCCATTGGTGCAACAACAACAATTTCTAGGGCAGCAACAACAACAATTTCCAGGGCAACAACA  
ACCATTTCCACCACAACAGCCATATCCGCAGCCGCAACCATTTCTGCCACAACACTACCATATCCGCAGCCGCAACCATTTCCACCACAACAATCA  
TATCCACAACCACAACCACAATATCCGCAACCACAACAACCAATTTTCGCAGCAACAAGCACAACACTACAACAACAACAACAACAACAACAAC  
ACAACAATCCTTCAACAAATTTCTGCAACAACAACACTGATTCCATGCAGGGATGTCGTCTTGCAACAACCCAATATAGCACATGCAAGCTCACA  
AGTATCGCAACAAAGTTACCAACTGTTGCAACAATTATGTTGTCTGCAACTGTGGCAGACCCCCGAGCAGTCACGGTGCCAAGCCATCCACAAT  
GTCATTCATGCTATTATTTTGCATCAACAACAACAACAACAACAACAACAACAACAACAACAACAACAACAACAACAACAACAACCGT  
CGAGCCAGGTCTCCTACCAGCAGCCTCAGCAACAATATCCATCAGGCCAGGGCTTCTTCCAGCCATCTCAGCAAAAACCCACAGGCCAGGGCTT  
TGTCCAACCTCAGCAACTGCCGAGTTCGAGGAAATAAGGAACCTAGCGCTGCAGACGCTACCAGCAATGTGCAATGTCTACATCCCTCCATAT  
TGCTCGACCACCATTGCGCCATTTGGCATCATGAGTACTAACTGA

>Gli- $\alpha$ 14 deduced protein (296 aa)

MKTFLILALLAIVATTTTTAVRVPVLPQLQPQNPSQQQPQEQVPLVQQQFFPGQQQFPFPQQPYQPQPFLPQLPYPQPFPFPQQS  
YPQPQPYPQPQPISQQQAQLQQQQQQQQQQQILQQILQQQLIPCRDVLQQPNIAHASSQVSQQSYQLLQQLCCLQLWQTPEQSRCQAIHN  
VIHAIILHQQQQQQQQQQQQQQQQQQQPSSQVSYQQPQQYPSGQFFQPSQQNPQAQGFVQPQLPQFEEIRNLALQTLPAMCNVYIPY  
CSTTIAPFGIMSTN\*

>Gli- $\alpha$ 15 transcript (942 bp)

ATGAAGACCTTTCTCATCCTTGCCCTCCTTGCTATCGTGGCGACCACCGCCACAACACTGCAGTTAGAGTTCAGTGCCACAATTGCAGCCACAAA  
ATCCATCTCAGCAACAGCCACAAGAGCAAGTTCCATTGGTACAACAACAACAATTTCCAGGGCAGCAACAACAATTTCCACCACAACAGCCATA  
TCCGCAGCCGCAACCATTTCCATCACAACAACCATATCTGCAACTGCAACCATTTCCGCAGCCGCAACCATTTCCGCCACAACACTACCATATCCG  
CAGCCGCAATCATTTCACCACAACAACCATATCCACAACAGCAACCACAGTATCTACAACCACAACAACAATTTCCGCAGCAACAAGCACAAC  
ACAACAACAACAACAACAACAACAACAACAACAACAACAACAACAACAACAACAACAACAACAACAACAACAACAACAACAACAACAACAACA  
GCAACAACACAACATAGCGCATGCAAGCTCACAAGTTTTGCAACAAGTACTTACCAGCTATTGCAACAATTGTGTTGTCAACAACACTGTTGCAG  
ATCCCTGAGCAGTCGAGGTGCCAAGCCATCCATAATGTTGCTCATGCTATTATTATGCATCAACAACAACAACAACAACAAGAACAACAACAAC  
AGTTGCAACAACAACAACAGCAGCAACTGCATCAACAACGACAACAACCATCGAGCCAGGTCTCCTTCCAACAGCCTCAGCAGCAATATCCATC  
AAGCCAGGTCTCCTTCCAGCCATCTCAGCTAAACCCACAGGCTCAGGGCTCTGTCCAACCTCAACAACACTGCCCCAGTTCCGCGAAATAAGGAAC  
CTAGCGCTACAGACGCTACCTGCAATGTGCAATGTCTACATCCCTCCACATTGCTCGACCACCATTGCGCCATTTGGCATCTTTGGTACCAACT  
GA

>Gli- $\alpha$ 15 deduced protein (313 aa)

MKTFLILALLAIVATTATTAVRVPVLPQLQPQNPSQQQPQEQVPLVQQQFFPGQQQFPFPQQPYQPQPFPSPQPYLQLQFPFPQPFPFPQLPYP  
QPQSFPPQQPYPQQQPQYLQPQPISQQQAQQQQQQQQQQQQQQQILQQILQQQLIPCRDVLQQHNIHASSQVLQQSTYQLLQQLCCQQLLQ  
IPEQSRCQAIHNVAHAIIMHQQQQQQQEQQQQLQQQQQQQLHQRRQQPSSQVSVFQQPQQQYPSQVSVFQPSQLNPQAQGSVQPQQLPQFAEIRN  
LALQTLPAMCNVYIPPHCSTTIAPFGIFGTN\*

```

>Gli- $\alpha$ 16 transcript (942 bp)
ATGAAGACCTTTCTCATCCTTGCCCTCCTTGCTATCGTGGCGACCACCGCCACAACCTGCAGTTAGAGTTCAGTGCCACAATTGCAGCCACAAA
ATCCATCTCAGCAACAGCCACAAGAGCAAGTTCATTGGTACAACAACAACAAATTTCCAGGGCAGCAACAACAATTTCCACCACAACAGCCATA
TCCGCAGCCGCAACCATTTCCATCACAACAACCATATCTGCAACTGCAACCATTTCCGCAGCCGCAACCATTTCCGCCACAACCTACCATATCCG
CAGCCGCAATCATTTCACCACAACAACCATATCCACAACAGCAACCACAGTATCTACAACCACAACAACCAATTTTCGCAGCAACAAGCACAAAC
AACAAACAACAACAACAACAACAACAACAACAACAACAACAACAACAACAACAACAACAACAACAACAACAACAACAACAACAACAACAACAACA
GCAACAACACAACATAGCGCATGCAAGCTCACAAGTTTTGCAACAAGTACTTACCAGCTATTGCAACAATTGTGTTGTCAACAACCTGTTGCAG
ATCCCTGAGCAGTCGAGGTGCCAAGCCATCCATAATGTTGCTCATGCTATTATTATGCATCAACAACAACAACAACAACAAGAACAACAACAAC
AGTTGCAACAACAACAACAGCAGCAACTGCAACAACAACGACAACAACCGTCGAGCCAGGTCTCCTTCCAACAGCCTCAGCAGCAATATCCATC
AAGCCAGGTCTCCTTCCAGCCATCTCAGCTAAACCCACAGGCTCAGGGCTCCGTCCAACCTCAACAACCTGCCCCAGTTTCGGGAAATAAGGAAC
CTAGCGCTACAGACGCTACCTGCAATGTGCAATGTCTACATCCCTCCACATTGCTCGACCACCATTGCGCCATTTGGCATCTTTGGTACCAACT
GA
>Gli- $\alpha$ 16 deduced protein (313 aa)
MKTFLILALLAIIVATTATTAVRVPVPLQLPQNPSQQQPQEQVPLVQQQQFFPGQQQQFPFPQYPQPQPFPSQQPYLQLQPFPPQPFPPQLPYP
QPQSFPPQQPYPQQQPQYLQFPQQPISQQQAQQQQQQQQQQQQQQQILQQILQQQLIPCRDVVLQQHNIHASSQVLQQSTYQLLQQLCCQQLLQ
IPEQSRCQAIHNVAHAIIMHQQQQQQQEQQQQLQQQQQQQLQQQRQQPSSQVSVFQQPQQQYPSQVSVFQPSQLNPQAQGSVQPQQLPQFAEIRN
LALQTLPAMCNVYIIPHCSTTIAPFGIFGTN*

>Gli- $\alpha$ 17 transcript (894 bp)
ATGAAGACCTTTCTCATCCTTGCCCTCCTTGCTATCGTGGCGACCACCACCACAACCTGCAGTTAGAGTTCAGTGCCACAATTGCAGCCACAAA
ATCCATCTCAGCAACAACCACAAGAGCAAGTTCATTGGTGAACAACAACAATTTCTAGGGCAGCAACAACAACAATTTCCAGGGCAACAACA
ACCATTTCCACCACAACAGCCATATCCGCAGCCGCAACCATTTCTGCCACAACCTACCATATCCGCAGCCGCAACCATTTCCACCACAACAATCA
TATCCACAACCACAACCACAATATCCGCAACCACAACAACCAATTTTCGCAGCAACAAGCACAACTACAACAACAACAACAACAACAACAACAACA
AACAAACAACAACAACAACAACAACAACAACAACAACAACAACAACAACAACAACAACAACAACAACAACAACAACAACAACAACAACAACAACA
AGTATCGCAACAAGTTACCAACTGTTGCAACAATTATGTTGTCTGCAACTGTGGCAGACCCCCGAGCAGTCACGGTGCCAAGCCATCCACAAT
GTCATTTCATGCTATTATTTTGCATCATCAACAACAACAACAACAACAACAACAACAACAACAACAACAACAACAACAACAACAACAACAACAAC
CGTCGAGCCAGGTCTCCTACCAGCAGCCTCAGCAACAATATCCATCAGGCCAGGGCTTCTTCCAGCCATCTCAGCAAAACCCACAGGCCAGGG
CTTTGTCCAACCTCAGCAACTGCCGCAGTTCGAGGAAATAAGGAACCTAGCGCTGCAGACGCTACCAGCAATGTGCAATGTCTACATCCCTCCA
TATTGCTCGACCACCATTGCGCCATTTGGCATCATGAGTACTAAGTGA
>Gli- $\alpha$ 17 deduced protein (297 aa)
MKTFLILALLAIIVATTTTTAVRVPVPLQLPQNPSQQQPQEQVPLVQQQQFLGQQQQQFFPGQQQFPFPQYPQPQPFPLPQLPYPQPQPFPPQQS
YPQPQYPQPQQPISQQQAQLQQQQQQQQQQQQQILQQILQQQLIPCRDVVLQQPNIAHASSKVSQQSYQLLQQLCCLQLWQTPEQSRCQAIHN
VIHAIILHHQQQQQQQQQQQQQQQQQQQQQQQQQQPSSQVSYQQPQQQYPSGQGFQPSQQNPQAQGFVQPQQLPQFEEIRNLALQTLPAMCNVYIPP

```



VVHAIILHHHQQQQQQPSSQVSYQQPQEQYPSGQGSFQSSQQNPOAQGSVQPQQLPQFQEIRNLALQTLPAMCNVYIPPYCSTTIAPFGIFGTN  
\*

>Gli- $\alpha$ 20 transcript (861 bp)

ATGAAGACCTTTCTCATCCTTGCCCTCCTTGCTATTGTAGCAACCACCGCCACAATTGCAGTTAGAGTTCAGTGCCACAATTGCAGCCACAAA  
ATCCATCTCAGCAACAACCACAAGAGCAAGTTCATTGGTACAACAACAGCAATTTCCAGGGCAGCAACAACCATTTCCACCACAACAACCATA  
TCCGCAGCCGCAACCATTTCCATCACAACAACCATATCTGCAGCTGCAACCATTTCCGCAGCCGCAACTACCATATCCGCAGCCGCAACTACCA  
TATCCGCAGCCGCAACCATTTGACCACAACAACCATATCCACAACCGCAACCACAGTATTCGCAACCACAACAACCAATTTTCGCAGCAGCAAC  
ACAACAACAACAACAATCCTTCAACAAATTTTGCAACAACAACACTGATTCCATGCAGGGATGTTGTATTGCAACAACACAACATAGCGCATGG  
AAGGTCACAAGTTTTGCAACAAGTACTTACCAGCTGGTGAACAATTGTGTTGTGTCAGCAGCTGTGGCAGATCCCCGAGCAGTCGCGGTGCCAA  
GCCATCCACAATGTTGTTTCATGCTATTATTCTGCATCATCATCAACAACAACAACAACAACAACAACCAGTTGACCCAGGTCTCCTTCCAACAGC  
CTCAACAACAATATCCATCAGGCCAGGGCTCCTTCCAGCCATCTCAGCAAAAACCCACAGGCCAGGGCTCTGTCCAGCCTCAACAACACTGCCCCA  
GTTTGAGGAAATAAGGAACCTAGCGCTAGAGACGCTACCTGCAATGTGCAATGTCTATATCCCTCCATATTGCACCATTGCTCAAGTTGGCATC  
TTCGGTACTAACTGA

>Gli- $\alpha$ 20 deduced protein (286 aa)

MKTFLILALLAIVATTATIIVRVVPVQLQPQNPSQQQPQEQVPLVQQQFPFGQQQPFPPQQPYQPQPFPSQQPYLQLQPFPPQPLPYQPQLP  
YPQPQPFPPQPYQPQPYSPQQPISQQQQQQQQIILQQILQQQLIPCRDVVLQQHNIHGRSQVLQOSTYQLVQQLCCQQLWQIPEQSRCQ  
AIHNVVHAIILHHHQQQQQQQPLTQVVSFQQPQQQYPSGQGSFQPSQQNPOAQGSVQPQQLPQFEEIRNLALETLPAMCNVYIPPYCTIAQVGI  
FGTN\*

>Gli- $\alpha$ 21 transcript (882 bp)

ATGAAGACCTTTCTCATCCTTGCACTCCTTGCTATTGTAGCAACCACCGCCACAATTGCAGTTAGAGTTCAGTGCCACAATTGCAGCCACAAA  
ATCCATCTCAGCAACAACCACAAGAGCAAGTTCATTGGTACAACAACAACAATTTCCAGGGCAGCAACAACCATTTCCACCACAACAGCCATA  
TCCGCAGCCGCAACCATTTCCATCACAACAACCATATCTGCAGCTGCAGCCATTTCCGCAGCCGCAACTACCATATCCGCAGCCGCATCTACCA  
TATCCGCAGCCGCAACCATTTGACCACAACAACCATATCCACAACCGCAACCACAGTATTCGCAACCACAACAACCAATTTTCGCAGCAGCAGC  
ACAACAACAACAACAACAACAACAACAACAACAGATCCTTCAACAAATTTTGCAACAACAACACTGATTCCATGCAGGGATGTTGTATTGCAACAACA  
CAGCATAGCGCATGGAAGCTCACAAGTTTTGCAACAAGTACTTACCAGCTGGTGAACAATTGTGTTGTCAGCAGCTGTGGCAGATCCCCGAG  
CAGTCGCGGTGCCAAGCCATCCACAATGTTGTTTCATGCTATTATTCTGCATCAACAACAACAACAACAACAACAACAACAACAACCGTTGA  
GCCAGGTCTCCTTCCAACAGCCTCAACAACAATATCCATCAGGCCAGGGCTCCTTCCAGCCATCTCAGCAAAAACCCACAGGCCAGGGCTCTGT  
CCAGCCTCAACAACACTGCCCCAGTTTGAGGAAATAAGGAACCTAGCGCTAGAGACGCTACCTGCAATGTGCAATGTCTATATCCCTCCATATTGC  
ACCATTGCTCCAGTTGGCTTCTTCGGTACTAACTGA

>Gli- $\alpha$ 21 deduced protein (293 aa)

MKTFLILALLAIVATTATIIVRVVPVQLQPQNPSQQQPQEQVPLVQQQFPFGQQQPFPPQQPYQPQPFPSQQPYLQLQPFPPQPLPYQPPLP

YPQPQPFPRPQQPYQPQPQYSQPQQPISQQQQQQQQQQQQQIILQQIILQQQLIPCRDVVLQQHSIAHGSSQVLQQSTYQLVQQLCCQQLWQIPE  
QSRCQAIHNVVHAIILHQQQQQQQQQQQQPLSQVVSFQQPQQQYPSGQGSFQPSQQNPQAQGSVQPQQLPQFEEIRNLALETL PAMCNVYIPPYC  
TIAPVGGFFGTN\*

>Gli- $\alpha$ 22 transcript (927 bp)

ATGAAGACCTTTCTCATCCTTGCCCTCCTTGCTATTGTAGCAACCACCGCCACAATTGCAGTTAGAGTTCCAGTGCCACAATTGCAGCCACAAA  
ATCCATCTCAGCAACAACCACAAGAGCAAGTTTCATTGGTACAACAACAATTTCCAGGGCAGCAACAACCATTTCCACCACAACAGCCATA  
TCCGCAGCCGCAACCATTTCCATCACAACAACCATATCTGCAGCTGCAACCATTTCCGCAGCCGCAACTACCATATCCGCAGCCGCAACTACCA  
TATCCGCAGCCGCAACTACCATATCCGCAGCCGCAACCATTTTCGACCACAACAACCATATCCACAATCGCAACCACAGTATTCGCAACCACAAC  
AACCAATTTTCGCAGCAGCAGCAGCAGCAACAACAACAACAACAACAACAACAACAACAACAACAACAACAACAACAACAACAACAACAACAACA  
ACAACAACACTGATTCCATGCAGGGATGTTGTATTGCAACAACACAGCATAGCGTATGGAAGCTCACAAGTTTGGCAACAAGTACTTACCAGCTG  
GTGCAACAATTTGTGTTGTCAGCAGCTGTGGCAGATCCCCGAGCAGTCGCGGTGCCAAGCCATCCACAATGTTGTTTCATGCTATTATTCTGCATC  
AACAGCAACAACAACAACAACAACAACAACAACAACAACCGTTGAGCCAGGTCTCCTTCCAACAGCCTCAACAACAATATCCATCAGGCCAGGG  
CTCCTTCCAGCCATCTCAGCAAAACCCACAGGCCAGGGCTCTGTCCAGCCTCAACAACACTGCCCCAGTTTGGAGAAATAAGGAACCTAGCGCTA  
GAGACGCTACCTGCAATGTGCAATGTCTATATCCCTCCATATTGCACCATTGCTCCAGTTGGCATCTTCGGTACTA ACTGA

>Gli- $\alpha$ 22 deduced protein (308 aa)

MKTFLILALLAI VATTATI AVRVPV PQLQPQNPSQQQPQE QVSLVQQQQFPGQQQPFPPQQPYQPQPFPSQQPYLQLQPFPPQPLPYQPQLP  
YPQPQLPYQPQPFPRPQQPYQPQYSQPQQPISQQQQQQQQQQQQKQQQQQQQIILQQIILQQQLIPCRDVVLQQHSIAYGSSQVLQQSTYQL  
VQQLCCQQLWQIPEQSRCQAIHNVVHAIILHQQQQQQQQQQQQPLSQVVSFQQPQQQYPSGQGSFQPSQQNPQAQGSVQPQQLPQFEEIRNLAL  
ETLPAMCNVYIPPYCTIAPVGI FG TN\*

>Gli- $\alpha$ 23 transcript (930 bp)

ATGAAGACCTTTCTCATCCTTGCCCTCCTTGCTATTGTAGCAACCACCGCCACAATTGCAGTTAGAGTTCCAGTGCCACAATTGCAGCCACAAA  
ATCCATCTCAGCAACAACCACAAGAGCAAGTTCCATTGGTACAACAACAATTTCCAGGGCAGCAACAACCATTTCCACCACAACAGCCATA  
TCCGCAGCCGCAACCATTTCCATCACAACAACCATATCTGCAGCTGCAACCATTTCCGCAGCCGCAACTACCATATCCGCAGCCGCAACTACCA  
TATCCGCAGCCGCAACTACCATATCCGCAGCCGCAACCATTTTCGACCACAACAACCATATCCACAATCGCAACCACAGTATTCGCAACCACAAC  
AACCAATTTTCGCAGCAGCAGCAGCAACAACAACAACAACAACAACAACAACAACAACAACAACAACAACAACAACAACAACAACAACAACAACA  
ACAACAACACTGATTCCATGCAGGGATGTTGTATTGCAACAACACAGCATAGCGTATGGAAGCTCACAAGTTTGGCAACAAGTACTTACCAGCTG  
GTGCAACAATTTGTGTTGTCAGCAGCTGTGGCAGATCCCCGAGCAGTCGCGGTGCCAAGCCATCCACAATGTTGTTTCATGCTATTATTCTGCATC  
AACAGCAACAACAACAACAACAACAACAACAACAACAACCAATTGAGCCAGGTCTCCTTCCAACAGCCTCAACAACAATATCCATCAGGCCA  
GGGCTCCTTCCAGCCATCTCAGCAAAACCCACAGGCCAGGGCTCTGTCCAGCCTCAACAACACTGCCCCAGTTTGGAGAAATAAGGAACCTAGCG  
CTAGAGACGCTACCTGCAATGTGCAATGTCTATATCCCTCCATATTGCACCATTGCTCCAGTTGGCATCTTCGGTACTA ACTGA



>Gli- $\alpha$ 23 deduced protein (309 aa)  
MKTFLILALLAIVATTATI AVRVPV PQLQPQNPSQQQPQEQVPLVQQQQFPGQQQPFPPQQPYQPQPFPSQQPYLQLQPFPPQQLPYQPQLP  
YPQPQLPYQPQPFPPQQPYPQSQPQYSQPQQPISQQQQQQQQQQQKQQQQQQQQQILQQILQQQLIPCRDVLQQHSIAYGSSQVLQQSTYQL  
VQQQLCCQQLWQIPEQSRCQAIHNVVHAIILHQQQQQQQQQQQKQPLSQVVSFQQPQQQYPSGQGSFQPSQQNPQAQGSVQFPQQLPFEEIRNLA  
LETLPAMCNVYIPPYCTIAPVGIFGTN\*

>Gli- $\alpha$ 24 transcript (876 bp)  
ATGAAGACCTTTCTCATCCTTGCCCTCCTTGCTATTGTGGCGACCACCGCCACAACCTGCAGTTAGAGTTCCAGTGCCACAATTGCAGCTACAAA  
ATCCATCTCAGCAACAGCCACAAGAGCAAGTTCCATTGGTACAAGAACAACAATTTCCAGGGCAGCAACAACCATTTCCACCACAACAGCCATA  
TCCGCAGCCGCAACCATTTCCATCACAACAACCATATCTGCAGCTGCAACCATTTCCACAGCCGCAACTACCATATCCGCAGCCGCAACCATTT  
CGACCACAACAACCATATCCACAGCCGCAACCACAGTATTCGCAACCACAACAACCAATTTTCGCAGCAGCAGCAGCAGCAGCAGCAACAACAAC  
ACAACAACAACAATCCTACAACAATTTTGCAACAACAACCTGATTCCATGCAGGGATGTTGTATTGCAACAACAACATAGCGCATGGAAG  
CTCACAAGTTTGTCAAGAAAGTACTTACCAGCTGGTGCAACAATTGTGTTGTCAGCAGCTGTGGCAGATCCCCGAGCAGTCGCGGTGCCAAGCC  
ATCCACAATGTTGTTTCATGCTATTATTCTGCATCAACAACACCACCACCACAACAACAACAACAACAACAACAACCGTTGAGCCAAG  
TCTCCTTCCAACAGCCTCAGCAACAATATCCATCAGGCCAGGGCTTCTTCCAACCATCTCAGCAAAACCCACAGGCCAGGGCTCTTTCCAGCC  
TCAACAACCTGCCCCAGTTTGTAGGCAATAAGGAACCTAGCGCTACAGACGCTACCTGCAATGTGCAATGTGTATATCCCTCCATATTGCACCATT  
GCTCCATTTGGCATCTTCGGTACTAACTGA

>Gli- $\alpha$ 24 deduced protein (291 aa)  
MKTFLILALLAIVATTATT AVRVPV PQLQLQNPSQQQPQEQVPLVQEQQFPGQQQPFPPQQPYQPQPFPSQQPYLQLQPFPPQQLPYQPQPF  
RPQQPYQPQPYQYSQPQQPISQQQQQQQQQQQQQQQILQQILQQQLIPCRDVLQQHNI AHGSSQVLQESTYQLVQQQLCCQQLWQIPEQSRCQA  
IHNVVHAIILHQQHHHHQQQQQQQQQQPLSQVVSFQQPQQQYPSGQGFFQPSQQNPQAQGSFQFPQQLPFEEAIRNLALQTLPAMCNVYIPPYCTI  
APFGIFGTN\*

>Gli- $\alpha$ 25 transcript (900 bp)  
ATGAAGACCTTTCTCATCCTTGCCCTCCTTGCTATTGTAGCAACCACCGCCACAATTGCAGTTAGAGTTCCAGTGCCACAATTGCAGCCACAAA  
ATCCATCTCAGCAACAACCCACAAGAGCAAGTTCCATTGGTACAACAACAACAATTTCCAGGGCAGCAACAACCATTTCCACCACAACAGCCATA  
TCCGCAGCTGCAACCATTTCCATCACAACAACCATATATGCAGCTGCAACCATTTCCGCAGCCGCAACTACCATATCCGCAGCCGCAACTACCA  
TATCCGCAGCCGCAACCATTTTCGACCACAACAATCATATCCACAACCGCAACCACAGTATTCGCAACCACAACAACCAATTTTCGCAGCAGCAGC  
AGCAGCAGCAGCAACAACAACAACAGATCCTTCAACAATTTTGCAACAACAACCTGATTCCATGCAGGGATGTTGTATTGCAACAACACAG  
CATAGCGCATGGAAGCTCACAAGTTTGTCAACAAGTACTTACCAGCTGGTGCAACAATTGTGTTGTCAGCAGCTGTGGCAGATCCCCGAGCAG  
TCGCGGTGCCAAGCCATCCACAATGTTGTTTCATGCTATTATTCTGCATCAACAACAACAACAACAACAACAACAACAACAACAACAACAACAAC  
ACAACAACAACCGTTGAGCCAGGTCTGCTTCCAACAGTCTCAACAACAATATCCATCAGGCCAGGGCTCCTTCCAGCCATCTCAGCAAAACCC  
ACAGGCCAGGGCTCTGTCCAGCCTCAACAACCTGCCCCAGTTTGTAGGAAATAAGGAACCTAGCGCTAGAGACGCTACCTGCAATGTGCAATGTC



ACAACAACAATTTCCCCAGCCCCAGCAACCACAACAACAATTTCCGCAGCCCCAGCAACCACAACAACCATTTCCCCAGCCCCAACAAGCCCCAA  
CTACCATTTCCCCAACAACCACAACAACCATTCCCCCAGCTCAACAACCCCCAACAACCATTTCCCCAGTCAACAGCAACCACAACAACCTTTTC  
CCCAGCCCCAACAACCGCAACAATCATTCCCCCAGCAACAACAACCGTTGATTTCAGCCATATCTACAACAACAGATGAACCCCTTGCAAGAATTA  
CCTCTTACAACAATGCAACCCTGTGTTCATTGGTGTTCATCCCTCGTGTCAATGATATTGCCACGAAGTGATTGCCAGGTGATGCAGCAACAATGT  
TGCCAACAACACTAGCACAGATTCCCTCGCCAGCTCCAGTGTGCAGCCATCCATAGCGTTCGTGCATTCCATCGTCATGCAGCAAGAACAACAACAAG  
GCATACAGATCCTCCGGCCACTGTTTTAGCTCGTCCAAGGTCAGGGCATCATCCAACCTCAACAACCAGCTCAATATGAGGTGATCAGGTCATT  
GGTATTGAGAACCCTTCCAAACATGTGCAACGTGTATGTCCGACCTGACTGCTCCACCATCAACGCACCATTTGCCAGCATAGTCGCCGGGCATC  
AGTGGACAATGA

> *Gli-γ2* deduced protein (285 aa)

MKTLFILITILAMATTIATANMQVDPSGQVQWPQQQPFQRFQPFYQQPQHTFPQPQQTFFPHQPPQQFPPQPPQQQFPPQPPQQPFPQPPQQAQ  
LPFPQQPQQPFPQPPQPQQPFPQSQQPQQPFPQPPQPQQSFPQQQQPLIQPYLQQQMNPCKNYLLQQCNPVSLVSSLVSMILPRSDCQVMQQQC  
CQQLAQIPRQLQCAAIIHVVHSIVMQQEQQQGIQILRPLFQLVQGGIIQFPQQPAQYEVIRSLVLRITLPNMCNVYVRPDCSTINAPFASIVAGI  
SGQ\*

> *Gli-γ3* transcript (858 bp)

ATGAAGACCTTATTCATCCTAACAATCCTTGCGATGGCAACAACACTATCGCCACCGCGAATATGCAGGTGACCCCCAGCGGCCAAGTACAATGGC  
CACAACAACAACCATTCCGCCAGCCCCAACAACCATTCTACCAGCAACCACAACACACATTTCCCCAACCCCCAACAACATTTCCCCATCAACC  
ACAACAACAATTTCCCCAGCCCCAGCAACCACAACAACAATTTCCGCAGCCCCAGCAACCACAACAACCATTTCCCCAGCCCCAACAAGCCCCAA  
CTACCATTTCCCCAACAACCACAACAACCATTCCCCCAGCTCAACAACCCCCAACAACCATTTCCCCAGTCAACAGCAACCACAACAACCTTTTC  
CCCAGCCCCAACAACCGCAACAATCATTCCCCCAGCAACAACAACCGTTGATTTCAGCCATATCTACAACAACAGATGAACCCCTTGCAAGAATTA  
CCTCTTACAGCAATGCAACCCTGTGTTCATTGGTGTTCATCCCTCGTGTCAATGATCTTGCCACGAAGTGATTGCCAGGTGATGCAGCAACAATGT  
TGCCAACAACACTAGCACAGATTCCCTCGCCAGCTCCAGTGTGCAGCCATCCATAGCGTTCGTGCATTCCATCGTCATGCAGCAAGAACAACAACAAG  
GCATACAGATCCTCCGGCCACTGTTTTAGCTCGTCCAAGGTCAGGGCATCATCCAACCTCAACAACCAGCTCAATATGAGGTGATCAGGTCATT  
GGTATTGAGAACCCTTCCAAACATGTGCAACGTGTATGTCCGACCTGACTGCTCCACCATCAACGCACCATTTGCCAGCATAGTCGCCGGGCATC  
AGTGGACAATGA

> *Gli-γ3* deduced protein (285 aa)

MKTLFILITILAMATTIATANMQVDPSGQVQWPQQQPFQRFQPFYQQPQHTFPQPQQTFFPHQPPQQFPPQPPQQQFPPQPPQQPFPQPPQQAQ  
LPFPQQPQQPFPQPPQPQQPFPQSQQPQQPFPQPPQPQQSFPQQQQPLIQPYLQQQMNPCKNYLLQQCNPVSLVSSLVSMILPRSDCQVMQQQC  
CQQLAQIPRQLQCAAIIHVVHSIVMQQEQQQGIQILRPLFQLVQGGIIQFPQQPAQYEVIRSLVLRITLPNMCNVYVRPDCSTINAPFASIVAGI  
SGQ\*

```

> Gli-γ4 transcript (1074 bp)
ATGAAGACCTTACTCATCCTGACGATCCTTGCGATGGCAATAACCATCAGCACCGCCAATATGCAGGTCGACCCTAGTGGCCAAGTACAATGGC
CACAACAACAACCTAGTCCCCCAACCCCAACAGCCATTATCCAGCAACCGCAACAAGCATTCCCCCAACCCCAACAACATTTCCCATCAACC
ACAACAACAAGTTCCCCAGCCTCAGCAACCACAACAACCATTTCTCCAGCCCCAACAAGCATTCCCCCAACAACCACAACAACCATTTCCCTCAG
ACTCAACAACCACAACAACCATTTCCCCAGCAACCACAACAACCATTTCCCCAGACTCAACAACCACAACAACCATTTCCCCAGCAACCACAAC
AACCATTTCCCCAGCAACCACAACAACCATTTCCCCAGACTCAACAACCACAACAACCATTTCCCCAGCAACCACAACAACCATTTCCCCAGAC
TCAACAACCACAACAACCATTTCCCCAGTTCCAGCAACCACACCAACCTTTCCCCAGCCCCAACAACAATTTCCCGCAGCCCCAACAACCGCAA
CAATCATTTCTCCAGCAACAACGACCGTTTCATTCAGCCATCTCTACAACAACGTTTGAACCCATGCAAGAATATCCTCTTGCAACAATGCAAAC
CTGCGTCATTGGTGTTCATCCCTCTGGTTCGATAATCTGGCCACAAGCGATTGCCAAGTGATGCAGCAACAATGCTGCCAAGAAGTAGCACAGAT
TCCTCAGCAGCTCCAGTGCAGCAGCCATCCATAGCGTTCGTGCATTCCATCATCATGCAGCAGCAACAACAACAACAACAACAACAACAACAACA
CAAGGCATGCATATCCTGCTGACACTATCTCAACAACAACAGTTGGGTCAAGGTACTCTCGTCCAAGGCCAGGGCATCATCCAACCTCAACAAC
TAGCTCAATTGGAGGCGATCAGGTCATTGGTGTGCAAACCTTTCCAACCATGTGCAACGTGTATGTCCCACCTGAGTGCTCCATCATCAGGGC
ACCATTTGCCAGCATAGTCGCGGGGATTGGTGGCCAATGA

> Gli-γ4 deduced protein (357 aa)
MKTLILLITILAMAITISTANMQVDPGQVQWPQQQLVPPQQPLSQQPQQAFPPQQPTFPHQPQQQVPPQQPQQPFLQPQQAFPPQQPQQPFPQ
TQQPQQPFPQQPQQPFPQTQQPQQPFPQQPQQPFPQQPQQPFPQTQQPQQPFPQQPQQPFPQTQQPQQPFPQQPQQPFPQTQQPQQPFPQQP
QSFLQQQRPFIQPSLQQRNLNPKNILQQCKPASLVSSLWSIIWPQSDCQVMQQQCCQELAQIQQQLQCAAIHSHVHSIIIMQQQQQQQQQQQQQ
QGMHILLTSLQQQQQLGQGTLVQGGQIIQPQQLAQLEAIRSLVLQTLPTMCNVYVPPECSIIRAPFASIVAGIGGQ*

> Gli-γ5 transcript (909 bp)
ATGAAGACCTTACTCATCCTAACAATCCTTGCGATGGCAACAACCATCGCCACCGCCAATATGCAAGTCGACCCCAGCGGCCAAGTACAATGGC
CACAACAACAACCATTTCCCCAGCCCCAACAACCATTTCTGCGAGCAACCACAACGAAGTATCCCCAACCCCATCAAACATTCACCATCAACC
ACAACAACATTTCCCCAACCAGAACAAACATACCCCATCAACCACAACAACATTTCCCCAGACCCAACAACCACAACAACCATTTCCCCAG
CCCCAACAACATTTCCCCAACAACCCCAACTACCATTTCCCCAACAACCCCAACAACCATTTCCCCAGCCTCAGCAACCCCAACAACCATTTCC
CCCAGTCACAACAACCACAACAACCTTTTCCCCAGCCCCAACAACAATTTCCGCAGCCCCAACAACCACAACAATCATTTCCCCAACAACAACA
ACCGGCGATTTCAGTCATTTCTACAACAACAGATGAACCCCTGCAAGAATTTCTCTTGCAGCAATGCAACCATGTGTTCATTGGTGTTCATCTCTC
GTGTCAATAATTTTGCCACGAAGTGATTGCCAGGTGATGCAGCAACAATGTTGCCAACAACCTAGCACAAATTCCTCAACAGCTCCAGTGCAGCAG
CCATCCACAGCGTCGCGCATTCCATCATCATGCAACAAGAACAACAACAAGGCGTGCCGATCCTGCGGCCACTATTTTCAGCTCGCCAGGGTCT
GGGTATCATCCAACCTCAACAACCAGCTCAATTGGAGGGGATCAGGTCATTGGTATTGAAAACCTTTCCAACCATGTGCAACGTGTATGTGCCA
CCTGACTGCTCCACCATCAACGTACCATATGCCAACATAGACGCTGGCATTGGTGGCCAATGA

> Gli-γ5 deduced protein (302 aa)
MKTLILLITILAMATTIATANMQVDPGQVQWPQQQPFPPQQPQQPFCEQPQRTIPQPHQTFHHQPPQTFPQPEQTYPHQPPQQQFPQTQQPQQPFPQ

```

PQQTFPQQPQLPFPQQPQQPFPQPPQQPQQPFPQSSQQPQQPFPQPPQQPFPQPPQQPQQSFPQQQQPAIQSFLQQQMNPKNFLLQQCNHVSLSVSSL  
VSIILPRSDCQVMQQQCCQQLAQIPQQLQCAAIHNSVAHSIIMQQEQQQGVPIILRPLFQLAQGLGIIQPQQPAQLEGIRSLVLKTLPTMCNVYVPPDCST  
INVPYANIDAGIGGQ\*

> *Gli-γ6* transcript (894 bp)

ATGAAGACCTTACTCATCCTAACAATCCTTGCATGGCAACAATAATCGCCACTGCCAATATGCAGGTCGACCCTAGCAGCCGAGTACAATGGC  
CACAAGAACAACCATCCCCCAGTCCCAACAACCATTCTCCAGCAACCACAACAATATTTCCCAACCCCAACAACATGCCCCATCAACC  
ACAACAAGCATTTCCCAACCTCAACAACATTTCCCCATCGACCACAACAACAATTTCCCAAGCCCAACAACCACAACAACCATTTCTCAG  
CCCCAACAACCCCAACTACCATTTCCCAACAACCACAACAACCATTTCCCAAGCCTCAACAACCCCAACAACCATTTCCCAAGTCACAGCAAC  
CACAACAACCTTTTTCCCAAGCCCAACAACAATTTCCGCAGCCCAACAACCACAACAATCATTCCCAACAACAACAATGGATGATTGAGTC  
ATTTCTACAACAACAGATGAACCCCTGCAAGAATTTCTCTTGCAGCAATGCAACCCTGTGTTCATTGGTGTTCATCTCTCGTGTCAATAATCTTG  
CCACGAAGTGATTGCCAGCTGATGCAGCAACAATGTTGCCAACAACCTAGCACAATTCCTCAACAGCTCCAGTGCAGCCATCCACAGCGTGC  
CGCATTCCATCGTCATGCAGCAAGAACAACAACGAGGCGTGCAGATCCTGCGGCCACTATTTCCAGCTCGCCAGGGTCTGGGTATCATCCAACC  
TCAACAACCAGCTCAATTGGAGGGGATCAGGTCATTGGTATTGAAAACCTCTCCAACCATGTGCAATGTGTATGTCCCACCTGACTGCTCCACC  
ATCAACGTGCCATATGCCAGCATAGACGCTGTCATTGGTGGCCAATGA

> *Gli-γ6* deduced protein (297 aa)

MKTLILLITILAMATIIATANMQVDPSSRVQWPQEQPSPQSSQQPFSQQPQQIFPQPQQTLPHQPQQAFPPQPQQTFFPHRPQQQFPQPQQPQQPFPQ  
PQQPQLPFPQQPQQPFPQPPQQPQQPFPQSSQQPQQPFPQPPQQPFPQPPQQPQQSFPQQQQWMIQSFLQQQMNPKNFLLQQCNVSLVSSLVSIIL  
PRSDCQLMQQCCQQLAQIPQQLQCAAIHNSVAHSIVMQEQQRGVQILRPLFQLAQGLGIIQPQQPAQLEGIRSLVLKTLPTMCNVYVPPDCST  
INVPYASIDAVIGGQ\*

> *Gli-γ7* transcript (876 bp)

ATGAAGACCTTACTCATCCTGACAATCCTTGCATGGCAATAACCATCGCCACCGCCAATATGCAGGTCGACCCTAGCGGCCAAGTACAATGGC  
CGCAACAACAACCATTCTGCAGCCTCACCAACCATTCTCCAGCAACCACAACAATATTTCCCAACCCCAACAACATTTCCCCATCAACC  
ACAACAACAATTTCCCAAGCCTCAGCAACCACAACAACAATTTCTCCAGCCCGACAACCATTCCCAACAACCACAACAACCATATCCCCAG  
CAACCACAACAACCGTTCCCAAGACTCAACAACCCCAACAACCATTTCCCAAGTCCAAGCAACCACAACAACCTTTTTCCCAAGCCCAACAAC  
CGCAACAATCATTCCCAACAACAACCATCATTGATTCAACAATCTCTACAACAACAGTTGAACCCATGCAAGAATTTCTCTTGCAGCAATG  
CAAACCTGTGTCTTTGGTGTTCATCCCTCTGGTCAATCATCTTGCCACCAAGCGATTGCCAGGTGATGCGGCAACAATGTTGTCAACAACCTAGCA  
CAAATTCCTCAGCAACTCCAGTGTGCAGCCATCCATAGCGTGTGCATTCCATCATCATGCAGCAAGAACAACAAGAACAACACTACAGGGTGTGC  
AAATCCTGGTGCCTACTGTCTCAACAGCAACAGGTGGGTCAAGGTATTCTCGTCCAGGGTCAAGGCATCATCCAACCTCAACAACCAGCTCAATT  
GGAGGTGATCAGGTCATTGGTGTGCAAACCTCTCCAACCATGTGCAACGTGTATGTCCCACCTTACTGCTCCACCATCAGGGCACCATTTGCT  
AGCATAGTCGCCAGCATTGGTGGCCAATGA

> *Gli-γ7* deduced protein (291 aa)  
MKTLLILTLILAMAITIATANMQVDPSGQVQWPQQQPFLLQPHQPFSSQQPQQIFPQPQQTFPHQPPQQVFPQPQQPQQQFLQPRQPFPPQQPQQPYPQ  
PQQPFPQTQQPQQPFPQSKQPQQPFPQPQQPQQSFPQQQPSLIQQSLQQQLNPKCNFLQCKPVSLVSSLWSIILPPSDCQVMRQCCQQLA  
QIPQQQLQCAAIHVVHSIIMQQEQQEQLQGVQILVPLSQQQVVGQGILVQGGI IQPQQPAQLEVIRSLVLQTLPTMCNVYVPPYCSTIRAPFA  
SIVASIGGQ\*

> *Gli-γ8* transcript (984 bp)  
ATGAAGACCTTACTCATCTGACAATCCTTGCGATGGCAATAACCATCGGCACCGCCAATATCCAGGTCGACCCTAGCGGCCAAGTACAATGGC  
TACAACAACAACACTAGTCCCCAGCTCCAACAGCCATTATCCAGCAACCACAACAACATTTCCCAACCTCAACAACATTTCCCCATCAACC  
ACAACAACAAGTTCCCCAGCCTCAGCAACCACAACAACCATTTCTCCAGCCCCAACAACCATTTCCCAACAACCACAACAACCATTTCCCCAG  
ACTCAACAACCACAACAACCATTTCCCCAGCAACCACAACAACCATTTCCCCAGACTCAACAACCCCAACAACCATTTCCCAACAACCACAAC  
AACCATTCCCCAGACTCAACAACCCCAACAACCATTTCCCCAGCTCCAGCAACCACAACAACCTTTTCCCCAGCCCCAACAACAATTGCCGCA  
GCCCCAACAACCGCAACAATCATTCCCCAACAACAACGGCCATTCAATCAACCATCTCTACAACAACAGTTGAACCCATGCAAGAATATCCTC  
TTGCAACAATGCAAACCTGCGTCATTGGTGTTCATCCCTCTGGTCAATAATCTGGCCACAAAGCGATTGCCAAGTGATGCGGCAACAATGCTGCC  
AACAACTAGCACAGATTCCCTCAACAGCTCCAGTGCGCAGCCATCCATAGCGTCGTGCATTCCATCATCATGCAGCAGCAGCAGCAACAACAACA  
ACAACAAGGCATGCATATCTTTCTGCCACTATCTCAGCAGCAACAGGTGGGTCAAGGTTCTCTAGTCCAAGGCCAGGGCATCATCCAACCACAA  
CAACCAGCTCAATTGGAGGCGATCAGATCATTGGTGTGCAAACTCTTCCATCCATGTGCAACGTGTATGTCCCACCTGAGTGCTCCATCATGA  
GGGCACCATTTGCCAGCATAGTCGCGGGCATTGGTGGCCAATGA

> *Gli-γ8* deduced protein (327 aa)  
MKTLLILTLILAMAITIGTANIQVDPSGQVQWLQQQLVLPQLQQPLSQQPQQTFPQPQQTFPHQPPQQVFPQPQQPQQPFLQPPQPFPPQQPQQPFPQ  
TQQPQQPFPQQPQQPFPQTQQPQQPFPQQPQQPFPQTQQPQQPFPQLQQPQQPFPQPQQQLPQPQQPQQSFPQQQRPF IQPSLQQQLNPKCNIL  
LQQCKPASLVSSLWSI IWPQSDCQVMRQCCQQLAQIPQQQLQCAAIHVVHSIIMQQQQQQQQQQGMHIFLPLSQQQVVGQGLVQGGI IQPQ  
QPAQLEAIRSLVLQTLPSMCNVYVPECSIMRAPFASIVAGIGGQ\*

> *Gli-γ9* transcript (897 bp)  
ATGAAGACCTTACTCATCTGACAATCCTTGCGATGGCAATAACCATCGGCACCGCCAATATGCAGGTCGACCCTAGCAGCCAAGTACAATGGC  
CACAACAACAACAGTCCCACAGCCTCACCAACCATTTCTCCAGCAACCACAACAACATTTCCCAACCCCAACAACATTTCCCCATCAACC  
ACAACAACAATTTCCCCAGCCTCAGCAACCACAACAACATTTCTCCAGCCCCAACAACCATTTCCCAACAACCACAACAACCATATCCCCAG  
CAACCACAACAACCATTTCCCCAGACTCAACAACCCCAACAACATTTTCCCCAGTCCCAGCAACCACAACAACAATTTTCTCAGCCCCAACAAC  
AATTTCCCGCAGCCCCAACAACCGCAACAATCATTCCCCAACAACAACCAACCGTTCAATTCAGCCATCTCTACAACAACAGGTGAACCCATGCAA  
GAATTTCTCTTGAGCAATGCAAACCTGTGTCACTGGTGTTCATCCCTCTGGTCAATGATCTGGCCACAAAGCGATTGCCAAGTGATGCGGCAA  
CAATGCTGCCAACAACACTAGCACAGATTCCCTCAGCAGCTCCAGTGTGCGCCATCCATACCATCATAATTCCATCATCATGCAGCAAGAACAAC

AAGAACAACAACAAGGCATGCATATCCTGCTGCCACTATATCAGCAGCAACAGGTGGGTCAAGGTACTCTCGTCCAGGGCCAGGGCATCATCCA  
ACCCCAACAACCAGCTCAATTGGAGGCGATCAGGTCATTGGTGTGCAAACCTCTTCCAACCATGTGCAACGTGTATGTCCCACCTGAGTGCTCC  
ATCATCAAGGCACCATTTTTCCAGCGTAGTCGCCGGCATTGGTGGCCAATGA

> *Gli-γ9* deduced protein (298 aa)

MKTLILLITILAMAITIGTANMQVDPSSQVQWPQQQPVVPHQPFSSQQPQQTFPQQQTFPHQPPQFFPQQPQQQFLQPQQPFPPQQPQQPYPQ  
QPQQPFPPQTQQPQQLFPPSSQQPQQQFSQPQQQFPQPQQPQQSFPQQQPPFIQPSLQQQVNPCKNFLLQQCKPVSLVSSLWSMIWPQSDCQVMRQ  
QCCQQLAQIPQQQLQCAAIHTIIHSIIMQQEQQEQQQGMHILLPLYQQQQVVGQGLVQGGI IQPQQPAQLEAIRSLVLTLPMTMCNVYVPPPCS  
I IKAPFSSVVAGIGGQ\*

> *Gli-γ10* transcript (888 bp)

ATGAAGACCTTACTCATCGTAACAATCCTTGCATGGCAACAACCATCGCCACCGCCAATATGCAAGTCGACCCCGGCTACCAAGTACAATGGC  
CACAACAACAACCATTCCCCCAGCCCCAACAACCATTTCTGCCAGCAACCACAACAACACTATTTCCCAACCCCATCAAACGTTCACCATCAACC  
ACAGCAAACATACCCCATCAACCACAACAACAATTTCCCCAGACCCAGCAACCACAACAACCATTTCCCCAGCCCCAACAAACATTTCCCCAA  
CAACCCCAACTACCATTTCCCCAACAACCCCAACAACCATTTCCCCAGCCTCAACAACCCCAACAACAATTTCCCCAGTCACAGCAACCACAAC  
AACCTTTTCCCCAGCCCCAACAACAATTTCTGCAGCCCCAACAACCGCAACAATCATTCCCCCAGCAACAACAACCGTTGATTCAGCTATCTCT  
ACAACAACAGATGAACCCCTGCAAGAATTTTCTCTTGCAAGCAATGCAACCCCTGTGTTCATTGGTGTTCATCCCTCATATCAATGATCTTGCCACGA  
AGTGATTGCCAGGTGATGCAGCAACAATGTTGCCAACAACCTGGCACAGATTCTCAGCAGCTCCAGTGTGCAGCCATCCATAGTGTCTGTCGAT  
CCATCATCATGCAGCAAGAACAACGACAAGGCGTGCAGATCCGGCGGCCACTGTTTCAGCTCGTTCAGGGTCAGGGCATCATCCAACCTCAACA  
ACCAGCTCAATTGGAGGTGATCAGGTCATTGGTATTGAGAACTCTTCCAACCATGTGCAACGTGTATGTCTCACCTGACTGCTCCACCATCAAC  
GCACCATTTGCCAACATAGTCGTCGGCATTGGTGGCCAATGA

> *Gli-γ10* deduced protein (295 aa)

MKTLIVTILAMATTIATANMQVDPGYQVQWPQQQPFPPQPQQPFCQQPQQTI PQQPHQTFHHQPPQTYPHQPPQFFPQTQQPQQPFPPQPQQTFPQ  
QPQLPFPQQPQQPFPQPQQPQQQFPQSQQPQQPFPQPQQQFLQPQQPQQSFPQQQQPLIQLSLQQQMNPKNFLLQQCNVSLVSSLISMI LPR  
SDCQVMQQCCQQLAQIPQQQLQCAAIHSVVHSIIMQQEQQRQGVQIRRPLFQLVQGGI IQPQQPAQLEVIRSLVLRRLTLPMTMCNVYVSPDCSTIN  
APFANIVVGIGGQ\*

> *Gli-γ11* transcript (897 bp)

ATGAAGACCTTACTCATCAAACAATCCTCGTGATGGCAATAACCATCGCCACCGCCAATATGCAGGTCGACCCTAGCGGCCAAGTACCATGGC  
CACAACAACAACCATTCCCGCAGCCTCACCAACCATTTCTCCAGCAACCGCAACAACATTTCCCAACCCCAACAACATTTCCCCATCAACC  
ACAACAACAATTTTCCCAGCCTCAGCAACCACAACAACAATTTATCCAGCCCCAACAACCATTTCCCAACAACCCACAACAACATATCCCCAG  
CAACCACAACAACCATTTCCCCCAGACTCAACAACCCCAACAACATTTTCCCCAGTCCCAGCAACCACAACAACAATTTCCCCAGCCCCAACAAC  
AATTTCCCGCAGCCCCAACAACCCACAACAATCATTCCCCCAACAACAACCATCGTTGATTCAACAATCTCTACAACAACAGTTGAACCCATGCAA

GAATTTCTCTTGCAACAATGCAAACCTGTGTCCTTGGTGTTCATCCCTCTGGTCAATGATCTTGCCACGAAGCGATTGCCAGGTGATGCGGCAA  
CAATGTTGCCAACAACACTAGCACAAATTCCTCAGCAACTCCAGTGTGCAGCCATCCATAGCATCGTGCATTCCATCATCATGCAGCAAGAACAAC  
AAGAACAACGACAGGGTGTGCAAATCCTGGTGCCACTGTCTCAACAGCAACAGGTAGGTCAAGGTACTCTCGTCCAAGGTGAGGGCATCATCCA  
ACCTCAACAACCAGCTCAATTGGAGGTGATTAGGTGATTGGTGTGCAAACCTCTTGCAACCATGTGCAACGTGTATGTCCCACCTTACTGCTCC  
ACCATCAGGGCACCATTTGCCAGCATAGTCGCCGGCATTGGTGGCCAATGA

> Gli- $\gamma$ 11 deduced protein (298)

MKTLIIQITILVMAITIIATANMQVDPSGQVPWPQQQPPFPQPHQPFSSQQPQQTFFPQPQQTFFPHQPPQQFSQPQQPQQQFIQPPQFPQQPQQTYPQ  
QPQQPFPQTQQPQQLFPPQSQQPQQQFPQPQQQFPQPQQPQQSFPQQQPSLIQQSLQQQLNPKNFLLQQCKPVSLSLWSSMILPRSDCQVMRQ  
QCCQQLAQIPQQQLQCAAIHSIVHSIIMQQEQQEQRQGVQILVPLSQQQVVGQGTLLVQGGI IQPQQPAQLEVIRSLVLQTLATMCNVYVPPYCS  
TIRAPFASIVAGIGGQ\*

### 3) Transcript and deduced protein sequences for the single transcribed and intact $\delta$ -gliadin gene (the transcript sequence is provided from start to stop codons)

> Gli- $\delta$ 1 transcript (984 bp)

ATGAAGATCTTCATGGTCTTTGCCCTCCTCGTTGCATCAACGACCATCACCACCGGACCGCACAGCTCGACCCTCGCATCCATGACCAAGAAA  
GGCCACAACAATCGTTTCTGCAACAGCAACCCTTATCCAGCAACAACCATAACCCGCCTCAAGAGCCACAACAACCCTATTCCTCGCAAAAAGA  
GCCACAACAACCATTTCCGCTGCAGCAGCCACAATACCAGCAACAACAACCGTATCCACAACAACCCTTCCCCAAGAACAACCTCCCCAGCAA  
CATTTATTTCCGCAGCAGCCGCCACAACAACAATTTCCACAACAGATGCCACTTCCGCATCAACAACAACATTTCCCGCAACAACAACAACAAC  
AACAACAACAAGAACAACCTCCCACAACAACCTCCCACAATTTCCCGCAACAACAACCATTTTCCCAATATCAACAACCATTAACACAACAACCATA  
CTCGCAAGAGCAACCATTGCCACAACAACAACCTTCTGTAGAGGAAAAACAACAATTGAACTTGTGCAAGGAGTTCCTCCTGCAGCAGTGTAAC  
CCAGAGGAGAACTGTCTGTTACTCCAGTCAGTGATCCCGTTCCTCCGACCAAAGACCTCGCAACAGAACAGCTGCCAGTTGAAGCGACTACAAT  
GTTGTGCGACAACCTGCACATATCAGTGAACCGTCCCGATGCCCGGCATCCACAACATTGTGCATGCCATCGTCATGCAACAACAACATGTGGA  
TAGAGGTTTCGGCCAGCCTCAACCACAACAGTTGGGCCAGGAAATGCCCATGCAGCCTCAACATCAATTGGGCCAGCACTCTATCCTACCTCAA  
CAACTAGCCCAGTACAAGTTGGTTAGGTTACTTGTGATTGAGACCCTTCTTATGTTATGCAACGTGCATGTCCCGTCTGATTGCTACACCATTA  
CTGCACCATTTGGTAGCATGACTGCCTACAATGGTGGACAATGA

> Gli- $\delta$ 1 deduced protein (327 aa)

MKIFMVFALLVASTTITTTATAQLDPRIHDQERPQQSFLQQQPLIQQQPYPPQEPQQPLFPQKEPQQPFPPLQQPQYQQQQPYPQQPLPQEQLPQQ  
HLFPQQPPQQQFPQQMPLPHQQQTFFPQQQQQQQQEQQLPQQLPQFPQQQPFSSQYQQPLTQQPYSQEQPLPQQQPSVEEKQQNLCKEFLQQCN  
PEEKLSLLQSVIPFLRPKTSQQNSQLKRLQCCRQLAHI SEPSRCPAIHNI VHAI VMQQQHVD RGFQGPQPQQLGQEMPMQPQHQLGQHSILPQ  
QLAQYKLVRLVLIQTL PMLCNVHVP SDCYTI TAPFGSMTAYNGGQ\*



4) Transcript and deduced protein sequences for five transcribed and intact  $\omega$ -gliadin genes (each transcript sequence is provided from start to stop codons)

> *Gli- $\omega$ 1* transcript (1080 bp)

```
ATGAAGACCTTCCTCATCTTCGTCCTCCTTGCCATGGCGATGAGCATCGTCACTGCTGCTAGGCAGCTAAACCCTAGCAAGCAAGAGTTGCAAT
CACCACAACAATTATATCCGCAGCAACCATATCCACAGCAACCATATCCACCACAACAACCATTTCCCACACCCCAACAATATTTCCCCCATCA
ATCACAACAACCATTTTCCCCACCACAACAATCATTTCCCCAACCCCAACAAGCAACCCCCCTACAACCACAACAACCATTTCCCCCAGCAACCC
CAACAACCACAACAAGCTTTTCCCCAACCCCAACAACAATTTGCCTTGCAACCACAACAACAATTTCCCAGCTCCAACAACCACAACAATCAT
TCCCACAACAACCCAGAGACCACACCCATTTCCCCAACAACCTAGAACAAAGTAATTTTACAGCAACCACAACAACCATTTCTCCTGCAACCGCA
ACAACCATTTCCCCCAGCAACCAGAACAATAATATCCCAGCAACCCCAACAACCTATTTTCTCAGTCACAACAACCATTTCCCAGCAACCCCAA
CAACCATTTCCCCTGCAACCGCAACAACCATTTCCCCAACAACCAGCACAAATAATTGCTCAGCAACCTCAACAACCATCCCCTCTGCAACCAC
AACAAACCGTTCCCTCCGGCAACCACAACAATCGTTCCCTCCAGCAACCACAACAACCATTTCCCCAACCCCAACAAGTAGTACAAATAAATCCCCA
GCAACCCCAACAACCATTTTCCCAGTCACGACAACCATTTCCCAGCAACCCCAACAACCATTTCCCAGTCAACCGCAACAACCATTTCCCAG
CAATCAGCACAAATAATTTCTCAGCAACCCCAACAACCATTTCCCTCTACAACCACAACAATCATTTCCCTTCGGCAATCACAACAACCGTTCCCTCC
AACAAACCACAACAACCATTTCCCCAACCCCAACAAGTAGTACAAATAAATTTCCCAGCAACCCCAACAACCATTTCCCTCTGCTGGCAAACCAACC
TCAGCAACCTTATCCACAACAGCAACCATCAGGAGTAATGGTATAG
```

> *Gli- $\omega$ 1* deduced protein (359 aa)

```
MKTFLIFVLLAMAMSIVTAARQLNPSKQELQSPQQLYPQQPYPPQPPFPPTPQQYFPHQSQQPFSPPQQSFPQPQQATPLQPQQPFPPQP
QQPQQAFPPQPQQQFALQPQQQFPQLQQPQQSFPQQPQRPHFPFQQLEQVISQQPQQPFLLPQQPFPQQPEQIIISQQPQQLFSSQQPFPQQPQ
QPFPLQPQQPFPQQPAQIIAQQPQQPSPLQPQQPFLRQPQQSFLQQPQQPFPQPQQVVQINPQQPQQPFSQSRQFPFPQQPQQPFPPLQPQQPFPQ
QSAQIIPQQPQQPFPPLQPQQSFLRQSQQPFLQQPQQPSPQPQQVVQIIPQQPQQPFPPLLANQPQQPYPPQQQPSGVMV*
```

> *Gli- $\omega$ 2* transcript (1221 bp)

```
ATGAAGACCTTCCTCATCTTGGTCCTCCTTGCCATGGCGACGAGCATGGTCACTGCTGCTAGGCCGCTAAACCCTAGCGACCAAGAGTTGCAAT
CACCACAACAACAATTTCCGGAAGAACAATCATATCCGCAGCAACCATATCCACAGCAAGCATTTCCCATAACCCCAACAATATTTCCCCGCATCA
ACCACAACAACCATTTTCCCTCAACCCCAACGACCAACCCCCCTCCAACCACAACAACCATTTCCCCCAGCAACCCCAACAACCACAACAATCTTTT
CCCCAGCCCCAACAACAATTTCCCCTTGCAACCACAACAACCATTTCCCCAGCCTCAACAGCCGATTTCCCCAACAACCACGAATACCATTCCCCG
AGCAACCCAGAGACCCCAACAACCACAACAATCTTTTCCCTCAGCCCCAACAACAATTTCCCCTTGCAACCACAACAACCATTTCCCCAGCCCCA
ACAACCACAACAACCATTTCCCCCAGCAACCCCAAGAGACCACAACAATCATTTCCCCCAGCAACCCAGAACAAATAATTTCCCCAGCAACCGCAACAA
CCATTCCCCCTACAACCGCAACAACCATTTCCCCCAGCAACCCAGAACAAATAATTTCCCAGCAATCCCAACAACCATTTCTCTCTGAGCCACAAC
AACCATTTTCCCAGCCCCAACAACCATTTATCCCAGCAACCCAGGACAAATAATTTCCCAGCAATCCCAACAACCATGCCCCCTCCAACCACAACA
ACCATTCCCCCAGCAACCCAGAACAAATAATTCGCCAGCAACCGCAACAACCATTTCCCTCTACAATCGCAACAACCATTTCCACCAGCAACCCAGAA
```





|                                    |                                                                                                                                                                                                                                                                                                                                                                                                                                                                                                                                                                                                                                                                                                                                                                                                                                                                                                                                                                                                                                                                                                                                                                                                                                                                                                                                                                                                                                                                                                                                                                                                                                                                                                                                                                                                                                                                                                                                  |
|------------------------------------|----------------------------------------------------------------------------------------------------------------------------------------------------------------------------------------------------------------------------------------------------------------------------------------------------------------------------------------------------------------------------------------------------------------------------------------------------------------------------------------------------------------------------------------------------------------------------------------------------------------------------------------------------------------------------------------------------------------------------------------------------------------------------------------------------------------------------------------------------------------------------------------------------------------------------------------------------------------------------------------------------------------------------------------------------------------------------------------------------------------------------------------------------------------------------------------------------------------------------------------------------------------------------------------------------------------------------------------------------------------------------------------------------------------------------------------------------------------------------------------------------------------------------------------------------------------------------------------------------------------------------------------------------------------------------------------------------------------------------------------------------------------------------------------------------------------------------------------------------------------------------------------------------------------------------------|
|                                    | <p>ACCCCAACAACCATGCCCCCTGCAACCGCAACAACCATTTCCCCCAACAACCACAACAACCATTTCCCCCAACAACCACAACAACCTTTCCCCCTA<br/> CAACCACAACAACCATTTCCCCCTACGACCGCAACAACCATTTTCCCAGCAACCCCAACAATCACAACAATCATTTCCCCAGCCCCAACCCAGC<br/> AACCCCAACAACCATCCATCCTGCAACCACAACAACCATTTCTGCAGCCCCAACAACAATTATCCCAGCAACTAGAACAACAATTTCCCAGCA<br/> ACCCCAACAACCATTTCCCCCAGCAACCACACCAACCTCAACAACCATATCCACAACAACAACCATATGGGAGTAGTCTTACAAGCATCGGTGGC<br/> CAATGA</p> <p>&gt;Gli-<math>\omega</math>5 deduced protein (377 aa)<br/> MKTFLIFVLLAMAMNIATAARQLNPSNKEIQSPQQSFSHQQQPFPQQPYPQQPYPSQQPYPSQQPFPPTPQPQFPQQSQQPFTQPQQPTPLQPQQ<br/> PFPQQPQQPQQPFPQPQQPFPWQPQQPFPQTQQSFPLQPQQPFPQQPQQPFPQPQLQFPQQPEQIIIPQQPQQPFLLESQQPFPQQPQQPFPQPQ<br/> QLIPMQPQQPFPQQSQQSQQPFPQPPQLFPELQQPIPQQPQQPFPPLQPQQPFPQQSQQPFPQQPQQPCPLQPQQPFPQQPQQPFPQQPQQPFPPL<br/> QPQQPFPPLRPQQPFSQQPQQSQQSFPQPQPQQPQQPSILQPQQPFLQPQQQLSQQLEQTIISQQPQQPFPQQPHQPQQPYPQQQPYGSSLTSIGG<br/> Q*</p>                                                                                                                                                                                                                                                                                                                                                                                                                                                                                                                                                                                                                                                                                                                                                                                                                                                                                                                                                                                                       |
| <p><b>Inactive<br/>members</b></p> | <p><b>5) Transcript sequence for 10 inactive gliadin genes (each transcript sequence is provided from 5' to 3' end)</b></p> <p>&gt;Gli-<math>\alpha</math>-<math>\psi</math>1 transcript (868 bp, coding sequence interrupted)<br/> ATGAAGACATTTCTCATCCTTGCCCTCCTTGCTATCGTGGCGACCACCGCCACAACCTGCAGTTAGAGTTCCAGTGCCACAATTGCAGCCACAAA<br/> ATCCATCTCAGCAACAGCCACAAGAGCAAGTTCCATTGGTACAACAACAACAATTTCTAGGGCAGCAACAACCATTTCCACCACAACAACCATA<br/> TCCACAGCCGCAACCATTTCCATCACAACAACCATATCTGCAGCTGCAACCATTTTTCGCAGCCGCAACTACCATATTCGCAGCCACAACCATTT<br/> CGACCACAACAACCATATCCACAACCGCAACCACAGTATTCGCAACCACAACAACCAATTTACAGCAGCAGCAGCAGCCAGCAACAACAACAA<br/> CAACAACAACAACAACAACAAGAACAACAATCCTTCAACAATTTTGCAACAACAACCTGACTCCATGCATGGATGTTGTATTGCAGCAACACA<br/> ACATAGCGGTGGAAGATCACAAGTTTTGCAACAAGTACTTACCAGCTGTTGCAAGAATTGTGTTGTCAGCACCTATGGCAGATCCCTGAGAA<br/> GTTGCAGTGCCAGGCCATCCACAATGTTGTTTCATGCTATTATTCTGCATCAACAACAAAAACAACAACAACAACCTATCGAGCCAGGTCTCCTTC<br/> CAACAGCCTCAGCAACAATATCCATTAGGCCAGGGCTCCTTCCGGCCATCTCAGCAAAACCCACAGGCCAGGGCTCTGTCCAGCCTCAACAAC<br/> TGCCCCAGTTCGAGGAAATAAGGAACCTAGCGCTACAGACGCTACCTGCAATGTGCAATGTCTACATCCCTCCATATTGCACCATCGCGCCATT<br/> TGGCATCTTCGGTACTAATTGA</p> <p>&gt;Gli-<math>\alpha</math>-<math>\psi</math>2 transcript (863 bp, coding sequence interrupted)<br/> ATGAAGACCTTTCTCATCCTTGTCCTCCTTGCTATTGTGGCGACCACCGCCACAACCTGCAGTTAGATTTCCAGTGCCACAATTGCAGCCACAAA<br/> AATCCATCTCAGCAACAGCCACAAGAGCAAGTTCCATTGGTACAACAACAACAATTTCTAGGGCAGCAACAACCATTTCCACCACAACAACCAT<br/> ATCCACAGCCGCAACCATTTCCATCACAACCTACCATATCTGCAGCTGCAACCATTTCCGAGCCGCAACTACCATATTCACAGCCACAACCATTT<br/> TCGACCACAACAACCATATCCACAACCGCAACCACAGTATTCGCAACCACAACAACCAATTTACAGCAGCAGCAGCAGCAGCAGCAGCAGCAA<br/> CAACAACAACAACAACAACAACAATCCTTCAACAATTTTGCAACAACAACCTGATTCCATGCATGGATGTTGTATTGCAGCAACACAACATAG<br/> CGCATGGAAGATCACAAGTTTTGCAACAAGTACTTACCAGCTGTTGCAAGAATTGTGTTGTC AACACCTATGGCAGATCCCTGAGCAGTCGCA</p> |

GTGCCAGGCCATCCACAATGTTGTTTCATGCTATTATTCTGCATCAACAACAAAAACAACAACAACAACCATCGAGCCAGGTCTCCTTCCAACA  
GCCTCTGCAACAATATCCATTAGGCCAGGGCTCCTTCCGGCCATCTCAGCAAAACCCACAGGCCAGGGCTCTGTCCAGCCTCAACAACCTGCCC  
CAGTTTCGAGGAAATAAGGAACCTAGCGCTACAGACGCTACCTGCAATGTGCAATGTCTACATCCCTCCATATTGCACCATCGCGCCATTTGGCA  
TCTTCGGTACTAACTGA

>*Gli- $\alpha$ - $\psi$ 3* transcript (1386 bp, coding sequence interrupted)

ATGGCAACAACCATCGCCACCGCCAATATGCAAGTCGACCCGGCTACCAAGTACAATGGCCACAACAACAACCATTCCCCAGCCCCAACAAC  
CATTCTGCCAGCAACCACAACAACTATTCCCCAACCCCATCAAACGTTCCACCATCAACCACAGCAAACATACCCCATCAACCACAACAACAA  
TTTCCCCAGACCCAGCAACCACAACAACCATTTCCCCAGCCCCAACAACAACTTTCCCCAACAACCCCAACTACCATTTCCCCAACAACCCCAAC  
AACCATTTCCCCAGCCTCAACAACCCCAACAACAATTTCCCCAGTCACAGCAACCACAACAACCTTTTTCCCCAGCCCCAACAACAATTCCTGCA  
GCCCCAACAACCGCAACAATCATTCCCCAGCAACAACAACCGTTGATTTCAGCTATCTCTACAACAACAGATGAACCCCTGCAAGAATTTTCTC  
TTGCAGCAATGCAACCCTGTGTTCATTGGTGTTCATCCCTCATATCAATGATCTTGCACGAAGTGATTGCCAGGTGATGCAGCAACAATGTTGCCA  
ACAACCTGGCACAGATTCCCTCAGCAGTTCCAGTGCCACAATTGCAGCCACAAAATCCATCTCAGCAACAGCCACAAGAGCAAGTTCCATTGGTAC  
ACAACAACAATTTCTAGGGCAGCAACAACCATTTCCACCACAACAACCATATCCACAGCCGCAACCATTTCCATCACAACAACCATATCTGCA  
GCTGCAACCATTTCTGCAGCCGCAACTACCATATTCACAGCCACAACCATTTTCGACCACAACAACCATATCCACAACCACAACCACAGTATTCG  
CAACCACAACAACCAATTTTCACAGCAGCAGCAGCAGCAGCAACAACAACAACAACAACAACAACAACAACAACAACAACAACAACAACAATCCTTCAACAATTT  
TGCAACAACAACCTGATTCCATGCATGGATGTTGTATTGCAGCAACACAACATAGCCCATGGAAGATCACAAGTTTTGCAACAAGTACTTACCA  
GCTGCTGCAAGAATTTGTGTTGTCAGCACCTATGGCAGATCCCTGAGCAGTCGCAGTGCCAGGCCATCCACAATGTTGTTTCATGCTATTATTCTG  
CATCAACAACAAAAACAACAACAACAACCATCGAGCCAGGTCTCCTTCCAACAGCCTCTGCAACAATATCCATTAGGCCAGGGCTCCTTCCGGC  
CATCTCAGCAAAACCCACAGGCCAGGGCTCTGTCCAGCCTCAACAACCTGCCCCAGTTTCGAGGAAATAAGGAACCAAGCGCTACAGACGCTACC  
TGCAATGTGCAATGTCTACATCCCTCCATATTGCACCATCGCGCCATTTGGCATCTTCGGTACTAACTGA

>*Gli- $\alpha$ - $\psi$ 4* transcript (1364 bp, coding sequence interrupted)

ATGAAGACCATTTCTCATCCTTGCCCTCCTTACTATCGTGGCGACCACCGCCACAACCTGCAGTTAGAGTCCAAGTTCACAATTTGTAGCCACAAA  
ATCCATCTCAGCAACAGCCACAAGAGCAAGTTCCATTGGTACAACAACAACAATTTCCAGGGCAGCAACAACCATTTCCACCACAACAGCCATA  
TCCGCGGCCGCAACCATTTTCATCACAACAACCATATCTGCAGCTGCAACCATTTCCGCAGCCGCAACTACCATATCCGCAGCCGCAACCATTT  
CGACCACAACAACCATATCCACAACCGCAACCACAGTATTAGCAACCACAACAACCAATTTTCGCAGCTGCAGCAGCAACAACAACAACAATAGC  
AACAACAACAGCAACAAAAACAGCAGCAACAACAACAGCAGCAGCAACAACAACAACAACAGCAACAACACCAGCAACAACAGCACCACAGCA  
GTAGCAGCAGCAGCAGCAACAACAACAACAACAACAACAACAGCAGCAGCAGCAGCAGCAGCAGCAGCAGCAGCAGCAGCAGCAGCAGCAGCAACAA  
CAACAACAACAACAACAACAACAACAACAACAACAACAACAACAGCAGCAGCAGCAGCAGCAGCAGCAGCAACAACAACAACAACAATAACAGCAAC  
AACCATTTCCACCACAACAACCATATCCACAGCCGCAACCATTTCCATCACAACAACCATATCTGCAACTGCAACCATTTCCGCAGCCGCAACT  
ACCATATTCACAGCCACAACCATTTTCGACCACAACAACCATATCCACAACCGCAACCACAGTATTGCAACCACAACAACAACAATTTTCACAGCAG



TCCACAGCCGCAACCATTTCCATCACAACAACCATATCTGCAGCTGCAACCATTTCCGCGAGCCGCAACTACCATATTTGCAGCCACAACCATTT  
CGACCACAACAACCATATCCACAACCGCAACCACAATATTCGCAACCACAACAACCAATTTACAGCAGCAGCAGCAGCAGCAACAACAACAAC  
ACAACAACAACAACAACAACAACAACAACAACAACAACAACAACAACAACAACAACAACAACAACAACAACAACAACAACAACAACAACAACA  
TGTGTATTGCAGCAACACAACATAGCGCATGGAAGATCACAAGTTTTGCAACAAGTACTTACCAGCTGTTGCAAGAATTGTGTTGTCAGCAC  
CTATGGCAGATCCCTGAGCAGTCGCAGTGCCAGGCCATCCACAATGTTGTTTCATGCTATTATTCTGCATCAACAACAAAAACAACAACAACAAC  
CATCGAGCCAGGTCTCCTTCCAACAGCCTCTGCAACAATATCATTAGGCCAGGGCTCCTTCCGGCCATCTCAGCAAACCCACTGGCCCAGGGC  
TCTGTCCAGCCTCAACAACCTGCCCCAGTTTCGAGGAAATAAGGAACCTAGCGCTACAGACGCTACCTGCAATGTGCAATGTCTACATCCCTCCAT  
ATTGCACCATCGTGCCATTTGGCATCTTCAGTACTAACTGA

>*Gli-γ-ψ1* transcript (863 bp, coding sequence interrupted)

ATGGCAATAACCATCGGCACCGCCAATATGCAGGTCGACCTAGCAGCCAAGTACAATGGCCACAACAACAACCAGTCCCACAGCCTCACCAAC  
CATTCTCCCAGCAACCACAACAACATTTCCCAACCCCCAACAACATTTCCCCATCAACCACAACAACAATTTCCCCAGCCTCAGCAACCACA  
ACAACAATTTCTCCAGCCCCAACAACCATTTCCCAACAACCACAACAACCATATCCCAGCAACCACAACAACCATTTCCCCAGACTCAACAAC  
CCCAACAACCTATTTCCCCAGTCCCAGCAACCACAACAACATTTTCTCAGCCCCAACAACAATTTCCCGCAGCCCCAACAACCGCAACAATCATT  
CCCCAACAACAACCACCGTTCATTAGCCATCTCTACAACAACAGGTGAACCCATGCAAGAATTTCTCTTGCAGCAATGCAAACCTGTGTCA  
CTGGTGTTCATCCCTCTGGTCAATGATCTGGCCACAAAGCGATTGCCAAGTGATGCGGCAACAATGCTGCCAACAACCTAGCACAGATTCTCAGC  
AGTCCAGTGTGCAGCCATCCATACCATCATACATTCCATCATCATGCAGCAAGAACAACAAGAACAACAACAAGGCATGCATATCCTGCTGCC  
ACTATATCAGCAGCAACAGGTGGGTCAAGGTACTCTCGTCCAGGGCCAGGGCATCATCAACCCCAACAACCAGCTCAATTGGAGGCGATCAGG  
TCATTGGTGTGCAAACCTTTCCAACCATGTGCAACGTGTATGTCCCACCTGAGTGCTCCATCATCAAGGCACCATTTTCCAGCGTAGTCGCCG  
GCATTGGTGGCCAATGA

>*Gli-γ-ψ2* transcript (1201 bp, coding sequence interrupted)

ATGAAGACCTTACTCATCCTAACAATCCTTGCATGGCAACAATAATCGCCACTGCCAATATGCAGGTCGACCTAGCAGCCGAGTACAATGGCC  
ACAAGAACAACCATCCCCCAGTCCCAACAACCATTTCTCCAGCAACCACAACAATATTTCCCAACCCCAACAACATTTGCCCATCAACCAC  
ACAAGCATTCCCCAACCTCAACAACATTTCCCAATCGACCACAACAACAATTTCCCCAGCCCCAGCAACCACAACAACCATTTCTCAGCC  
CCAACAACCCCAACTACCATTTCCCAACAACCTACAACAACAACCTAGTCCCAGCTCCAACAGCCATTATCCAGCAACCACAACAACATTTCC  
CCAACCTCAACAACATTTCCCAATCAACCACAACAACAAGTTCCCAGCCTCAGCAACCACAACAACCATTTCTCCAGCCCCAACAACCATTTCC  
CCAACAACCACAACAACCATTTCCCCAGACTCAACAACCACAACAACCATTTCCCCAGCAACCACAACAACCATTTCCCCAGACTCAACAACC  
CCAACAACCATTTCCCAACAACCACAACAACCATTTCCCCAGACTCAACAACCCCAACAACCATTTCCCCAGCTCCAGCAACCACAACAACCT  
TTTCCCCAGCCCCAACAACAATTTGCCGAGCCCCAACAACCGCAACAATCATTCCCCAACAACAACCGCCATTCAATTCAACCATCTCTACAAC  
AACAGTTGAACCCATGCAAGAATATCCTCTTGAACAATGCAAACCTGCGTCATTGGTGTTCATCCCTCTGGTCAATAATCTGGCCACAAAGCGA  
TTGCCAAGTGATGCGGCAACAATGCTGCCAACAACCTAGCACAGATTCTCAACAGCTCCAGTGCGCAGCCATCCATAGCGTCGTGCATTCCATC

ATCATGCAGCAGCAGCAGCAACAACAACAACAAGGCATGCATATCTTTCTGCCACTATCTCAGCAGCAACAGGTGGGTCAAGGTTCTCTAG  
TCCAAGGCCAGGGCATCATCCAACCACAACAACCAGCTCAATTGGAGGCGATCAGATCATTGGTGTGGAAACTCTTCCATCCATGTGCAACGT  
GTATGTCCCACCTGAGTGCTCCATCATGAGGGCACCATTTGCCAGCATAGTCGCGGGCATTGGTGGCCAATGA

>*Gli- $\omega$ - $\psi$ 1* (1319 bp, coding sequence interrupted)

ATGAAGACCTTCATCATATTTGTCCTCCTTGCCATGGCGATGAACATCGCCAGTGCCAGTAGGCTGCTAAGCCCTAGAGGCAAGGAATTGCATA  
CTCCACAAGAACAATTCCCCCAACAACAACAATTCCCCCAACCACAACAATTCCCCCAACAACAATCCCCCAACAACATCAAATCCCCCAGCA  
ACCACAACAATTCCCCCAACAACAACAATTCCCTCCAACAACAACAATCCCGCAACAACAAAATCCCCCAACAACATCAAATCCCCCAGCAACCA  
CAACAATTCCCCCAGCAACAGCAATTCCCCAACAACACCAATCCCCCAACAACAATTCCCACAACAACAATTCCCCCAACAGAAATTGCCGCA  
ACAGGAATTCCCACAACAACAATCTCCAGCAACCACAACAATCCCCCAGCAACAACAAAATCCCCCAGCAACCACAACAATTTCTCCAACAA  
CAACAATTCCCCCAGCAACAACCCCCCAACAACATCAATTTCCCAACAGCAATTGCCCAACAACAACAATCCCCCAACAACAACAATCC  
CCCAGCAACCACAACAATCCCCCAACAACAACAATCCCCCAGCAACCACAACAATCCCCCAACAACAATCCCGCAACAACAATTTCCCA  
ACAGCAATTCCCGCAACAGGAATTCCCAACAACAACAATTTCCCAACAACAATCGCCAGCAACCACAACAATCCCCCAACAACAACA  
ATCCCCCAGCAACCACAACAATTTCCCAACAACAACAATTTCCCCCAGCAACAATCACCCCAACAACAGCAATTTCCCAACAACAATTTCCCC  
ACAACAACAATTACCGCAAAAACAATTCCCCCAACCACAACAATACCCCAACAACAACAATCCCCCAGCAACCACAACAATTTCCCCCAGCA  
ACAATTTCCCCCAACAACAGCAATTTCCCCAACAACAAGAATTTCCCAACAGCAATTTCCCGCAACAACAATTCACCAACAACAATTTACCGCAA  
CAACAATTTCCCCAACAACAATTTCCCCAACAACAATTTCCCCAACAACAACAGTTCCCCCAACAACAACAATTAACGCAACAACAATTTCCCC  
GGCCACAACAATACCCTGAACAACAACAATTTCCCCAACAACAATTTCCCCCAGCAACCACCACAACAATTTCCCCAACAACAATTTCCAATACC  
ATACCCACCCAGCAATCACAGAACCTTTCCCATACCAACAATATCCACAACAACAACCATCTGGGAGCGACGTTATAAGTATCAGTGGCCTA  
TGA





**Table S5.** Computation of coeliac disease (CD) epitopes in the 11  $\gamma$ -gliadin, 1  $\delta$ -gliadin and 5  $\omega$ -gliadin proteins accumulated in Xiaoyan 81 mature grains.

| Gliadin                         | Gli locus             | DQ2.5                   |                         |                        |                        |                        |                        |                        |                         |                         |                         |                         | DQ2.2                  | DQ8                    |                        |               | DQ8.5         |               |                      |                       |                       |             |                        |                        |               |   |   |
|---------------------------------|-----------------------|-------------------------|-------------------------|------------------------|------------------------|------------------------|------------------------|------------------------|-------------------------|-------------------------|-------------------------|-------------------------|------------------------|------------------------|------------------------|---------------|---------------|---------------|----------------------|-----------------------|-----------------------|-------------|------------------------|------------------------|---------------|---|---|
|                                 |                       | DQ2.5-glia- $\alpha$ 1a | DQ2.5-glia- $\alpha$ 1b | DQ2.5-glia- $\alpha$ 2 | DQ2.5-glia- $\alpha$ 3 | DQ2.5-glia- $\gamma$ 1 | DQ2.5-glia- $\gamma$ 2 | DQ2.5-glia- $\gamma$ 3 | DQ2.5-glia- $\gamma$ 4a | DQ2.5-glia- $\gamma$ 4b | DQ2.5-glia- $\gamma$ 4c | DQ2.5-glia- $\gamma$ 4d | DQ2.5-glia- $\gamma$ 5 | DQ2.5-glia- $\omega$ 1 | DQ2.5-glia- $\omega$ 2 | DQ2.5-glut-L1 | DQ2.5-glut-L2 | DQ2.2-glut-L1 | DQ8-glia- $\alpha$ 1 | DQ8-glia- $\gamma$ 1a | DQ8-glia- $\gamma$ 1b | DQ8-glut-H1 | DQ8.5-glia- $\alpha$ 1 | DQ8.5-glia- $\gamma$ 1 | DQ8.5-glut-H1 |   |   |
| Gli- $\gamma$ 1                 | <i>Gli-A1</i>         | -                       | -                       | -                      | -                      | -                      | 1                      | -                      | -                       | 6                       | -                       | 2                       | 1                      | -                      | -                      | -             | -             | -             | -                    | 6                     | -                     | -           | -                      | -                      | -             | - | - |
| Gli- $\gamma$ 2                 | (1A)                  | -                       | -                       | -                      | -                      | 1                      | -                      | -                      | -                       | 4                       | -                       | -                       | -                      | -                      | -                      | -             | -             | -             | -                    | 4                     | -                     | -           | -                      | -                      | 1             | - | - |
| Gli- $\gamma$ 3                 |                       | -                       | -                       | -                      | -                      | 1                      | -                      | -                      | -                       | 4                       | -                       | -                       | -                      | -                      | -                      | -             | -             | -             | -                    | 4                     | -                     | -           | -                      | -                      | 1             | - | - |
| Gli- $\gamma$ 4                 | <i>Gli-B1</i>         | -                       | -                       | -                      | -                      | -                      | -                      | -                      | 1                       | 6                       | -                       | 3                       | -                      | -                      | -                      | -             | -             | -             | -                    | 6                     | -                     | -           | -                      | -                      | -             | - | - |
| Gli- $\gamma$ 5                 | (1B)                  | -                       | -                       | -                      | -                      | 1                      | 1                      | -                      | -                       | 1                       | 4                       | -                       | -                      | 1                      | -                      | -             | -             | -             | -                    | 4                     | -                     | -           | -                      | -                      | 1             | - | - |
| Gli- $\gamma$ 6                 |                       | -                       | -                       | -                      | -                      | 1                      | 1                      | -                      | -                       | 1                       | 4                       | -                       | -                      | -                      | -                      | -             | -             | -             | -                    | 4                     | -                     | -           | -                      | -                      | 1             | - | - |
| Gli- $\gamma$ 7                 |                       | -                       | -                       | -                      | -                      | 1                      | 1                      | 1                      | -                       | -                       | 2                       | -                       | -                      | -                      | -                      | -             | -             | -             | -                    | 2                     | 1                     | -           | -                      | -                      | 1             | - | - |
| Gli- $\gamma$ 8                 | <i>Gli-D1</i>         | -                       | -                       | -                      | -                      | 1                      | 1                      | -                      | -                       | -                       | 5                       | -                       | 3                      | -                      | -                      | -             | -             | -             | -                    | 5                     | -                     | -           | -                      | -                      | 1             | - | - |
| Gli- $\gamma$ 9                 | (1D)                  | -                       | -                       | -                      | -                      | 1                      | 1                      | 1                      | 1                       | -                       | 1                       | -                       | 1                      | -                      | -                      | -             | -             | -             | -                    | 1                     | 1                     | -           | -                      | -                      | 1             | - | - |
| Gli- $\gamma$ 10                |                       | -                       | -                       | -                      | -                      | 1                      | 1                      | -                      | -                       | -                       | 3                       | 1                       | -                      | 1                      | -                      | -             | -             | -             | -                    | 3                     | -                     | -           | -                      | -                      | 1             | - | - |
| Gli- $\gamma$ 11                |                       | -                       | -                       | -                      | -                      | 1                      | 1                      | -                      | -                       | 1                       | 1                       | -                       | 1                      | -                      | -                      | -             | -             | -             | -                    | 1                     | -                     | -           | -                      | -                      | 1             | - | - |
| <b>Gli-<math>\delta</math>1</b> | <i>Gli-D1</i><br>(1D) | -                       | -                       | -                      | -                      | -                      | -                      | -                      | -                       | -                       | -                       | -                       | -                      | -                      | -                      | -             | -             | -             | -                    | -                     | -                     | -           | -                      | -                      | -             | - | - |
| Gli- $\omega$ 1                 | <i>Gli-A1</i><br>(1A) | -                       | -                       | -                      | -                      | -                      | -                      | -                      | -                       | 1                       | -                       | 2                       | -                      | -                      | -                      | -             | -             | -             | -                    | 1                     | -                     | -           | -                      | -                      | -             | - | - |
| Gli- $\omega$ 2                 | <i>Gli-B1</i>         | -                       | -                       | -                      | -                      | -                      | -                      | -                      | -                       | 2                       | -                       | 1                       | -                      | -                      | -                      | -             | -             | -             | -                    | 2                     | -                     | -           | -                      | -                      | -             | - | - |
| <b>Gli-<math>\omega</math>3</b> | (1B)                  | -                       | -                       | -                      | -                      | -                      | -                      | -                      | -                       | -                       | -                       | -                       | -                      | -                      | -                      | -             | -             | -             | -                    | -                     | -                     | -           | -                      | -                      | -             | - | - |
| Gli- $\omega$ 4                 | <i>Gli-D1</i>         | -                       | -                       | -                      | -                      | -                      | -                      | -                      | -                       | 7                       | -                       | 7                       | 1                      | 1                      | -                      | -             | -             | -             | -                    | 7                     | -                     | -           | -                      | -                      | -             | - | - |
| Gli- $\omega$ 5                 | (1D)                  | -                       | -                       | -                      | -                      | -                      | -                      | -                      | -                       | 5                       | -                       | 5                       | 1                      | 1                      | -                      | -             | -             | -             | -                    | 5                     | -                     | -           | -                      | -                      | -             | - | - |

Note: The CD epitopes are divided into four groups based on specific human leucocyte antigen class II proteins (DQ2.5, DQ2.2, DQ8 and DQ8.5) to which they bind. Each color shaded value indicates the number of times a particular epitope is found in a given gliadin protein. The two gliadins marked in blue do not carry CD epitopes.

**Table S6.** PCR primers used for microsatellite marker analysis of the six *Gli* locus deletion lines.

| Marker          | Primer sequence (5' - 3')        | Chromosomal location | For the analysis of |
|-----------------|----------------------------------|----------------------|---------------------|
| <i>Xgdm33</i>   | F: GGCTCAATCAACCGTTCTT           | 1AS, -5.1 cM         | DLGliA1             |
|                 | R: TACGTTCTGGTGGCTGCTC           |                      |                     |
| <i>Xcfa2153</i> | F: TTGTGCATGATGGCTTCAAT          | 1AS, -2.3 cM         |                     |
|                 | R: CCAATCCTAATGATCCGCTG          |                      |                     |
| <i>Xgpw7072</i> | F: AATGCAGCGATGTCTTGCTA          | 1AS, 4.8 cM          |                     |
|                 | R: ACTGTTGGGGTTGTTGTTGC          |                      |                     |
| <i>Xgpw2276</i> | F: ATAGGGTCTTCTGTGCCCC           | 1AS, 13.8 cM         |                     |
|                 | R: ACCCACAGTTGAACTTGGG           |                      |                     |
| <i>Xwmc24</i>   | F: GTGAGCAATTTTGATTATACTG        | 1AS, 35.3 cM         |                     |
|                 | R: TACCCTGATGCTGTAATATGTG        |                      |                     |
| <i>Xpsp3000</i> | F: GCAGACCTGTGTCATGGTC           | 1BS, 2.4 cM          | DLGliB1             |
|                 | R: GATATAGTGGCAGCAGGATACG        |                      |                     |
| <i>Xwmc406</i>  | F: TATGAGGGTCGGATCAATACAA        | 1BS, 20.0 cM         |                     |
|                 | R: CGAGTTTACTGCAAACAAATGG        |                      |                     |
| <i>Xwmc230</i>  | F: AGAAGCGAGCAGGTGTGTTTGA        | 1BS, 20.5 cM         |                     |
|                 | R: CTGCTTCCTCCCACAACAGATG        |                      |                     |
| <i>Xgpw4069</i> | F: GCTCCCTTTGCGTATCATGT          | 1BS, 25.6 cM         |                     |
|                 | R: GCTCTTGCTCAGAAGCGAAT          |                      |                     |
| <i>Xwmc147</i>  | F: AGAACGAAAGAAGCGCGCTGAG        | 1DS, 17.5 cM         | DLGliD1             |
|                 | R: ATGTGTTTCTTATCCTGCGGGC        |                      |                     |
| <i>Xgpw7082</i> | F: AGGTACGGAGTGCAATGGAA          | 1DS, 23.0 cM         |                     |
|                 | R: CCCAACAGTCAGGTCAAGGT          |                      |                     |
| <i>Xwmc432</i>  | F: ATGACACCAGATCTAGCAC           | 1DS, 28.0 cM         |                     |
|                 | R: AATATTGGCATGATTACACA          |                      |                     |
| <i>Xcfd15</i>   | F: CTCCCGTATTGAGCAGGAAG          | 1DS, 28.1 cM         |                     |
|                 | R: GGCAGGTGTGGTGTGATCT           |                      |                     |
| <i>Xwmc336</i>  | F: GTCTTACCCCGCGATCTGC           | 1DS, 30.0 cM         |                     |
|                 | R: GCGGCCTGAGCTTCTTGAG           |                      |                     |
| <i>Xwmc222</i>  | F: AAAGGTGCGTTCATAGAAAATTAGA     | 1DS, 36.0 cM         |                     |
|                 | R: AGAGGTGTTTGAGACTAATTTGGTA     |                      |                     |
| <i>Xgpw4329</i> | F: AGGAGGACACTTGACTGTAGCC        | 6AS, -5.2 cM         | DLGliA2             |
|                 | R: GTTCATGCTTTTCTTCGTCTCA        |                      |                     |
| <i>Xgpw3041</i> | F: GCGTTTTTCTATTCTGCA            | 6AS, 5.1 cM          |                     |
|                 | R: ACACCCAAACACTCGGTCTC          |                      |                     |
| <i>Xgwm459</i>  | F: ATGGAGTGGTCACACTTTGAA         | 6AS, 5.7 cM          |                     |
|                 | R: AGCTTCTCTGACCAACTTCTCG        |                      |                     |
| <i>Xgwm334</i>  | F: AATTTCAAAAAGGAGAGAGA          | 6AS, 8.4 cM          |                     |
|                 | R: AACATGTGTTTTTAGCTATC          |                      |                     |
| <i>Xgpw2082</i> | F: AGCAAAATCATGCATTGAAAA         | 6AS, 28.0 cM         |                     |
|                 | R: CAACAACAGAAGGTGGGTGG          |                      |                     |
| <i>Xgpw7073</i> | F: CAACCATTTGACCACAACA           | 6AS, 29.6 cM         |                     |
|                 | R: CTCAGGGATCTGCCATAGGT          |                      |                     |
| <i>Xgpw7076</i> | F: ATTCGCAACCACAACCATT           | 6AS, 30.6 cM         |                     |
|                 | R: CTCAGGGATCTGCCATAGGT          |                      |                     |
| <i>Xgpw7592</i> | F: CAAGACAAGGACAGCAACGA          | 6AS, 59.9 cM         |                     |
|                 | R: TCAGGCGCTTTTGAAGATG           |                      |                     |
| <i>Xgdm113</i>  | F: ACCCATCTGATATTTGGGG           | 6BS, 36.0 cM         | DLGliB2             |
|                 | R: AAAATGCCCTTCCCAACC            |                      |                     |
| <i>Xbarc14</i>  | F: GCGTTGTGAAACTCAGTTTTGTTGATTTA | 6BS, 37.6 cM         |                     |
|                 | R: GCGGAAAGGAACGAAGTACATTTGTAGA  |                      |                     |
| <i>Xpsp3009</i> | F: CACCGGTTTTGACACCGATAGCC       | 6BS, 38.0 cM         |                     |
|                 | R: TGGGTAAGCTGCATGGGCAAACC       |                      |                     |

|                 |                               |              |         |
|-----------------|-------------------------------|--------------|---------|
| <i>Xwmc494</i>  | F: GGATCGAGTCTCAAGTCTACAA     | 6BS, 41.0 cM | DLGliD2 |
|                 | R: AGAAGGAACAAGCAACATCATA     |              |         |
| <i>Xgwm508</i>  | F: GTTATAGTAGCATATAATGGCC     | 6BS, 43.0 cM |         |
|                 | R: GTGCTGCCATGATATTT          |              |         |
| <i>Xbarc198</i> | F: CGCTGAAAAGAAGTGCCGCATTATGA | 6BS, 48.0 cM |         |
|                 | R: CGCTGCCTTTTCTGGATTGCTTGTC  |              |         |
| <i>Xwmc737</i>  | F: CGACTAGGACTAGACGACTCTAACGG | 6BS, 54.0 cM |         |
|                 | R: GTCGATCACCAGAGGCATTG       |              |         |
| <i>Xgpw4465</i> | F: GGTCATTATCTGTCCCCTTGC      | 6DS, 23.5 cM |         |
|                 | R: CGGTTTCAGTTTGCTACTTGC      |              |         |
| <i>Xcfd42</i>   | F: AGGTTCTAGGGGGCATGTCT       | 6DS, 33.7 cM |         |
|                 | R: GCTCTCAATGACTGCACTGG       |              |         |
| <i>Xcfd132</i>  | F: CAAATGCTAATCCCCGCC         | 6DS, 38.4 cM |         |
|                 | R: TGTAACAAGGTCGCAGGTG        |              |         |
| <i>Xcfd33</i>   | F: TACCGCAATAATCACACCCA       | 6DS, 55.0 cM |         |
|                 | R: GGTCGATGGACTGTCCCTAA       |              |         |
| <i>Xgdm127</i>  | F: ACGGGGAAATTAACGACC         | 6DS, 61.9 cM |         |
|                 | R: TGAGATGGAATCGACAGAAA       |              |         |
| <i>Xbarc196</i> | F: GGTGGGTTTTATCGAATAGATTTGCT | 6DS, 72.0 cM |         |
|                 | R: GCGTTTCGTCAAGATTAATGCAGTTT |              |         |

Note: F, forward primer; R, reverse primer. The primer sequences and chromosomal positions of the 36 microsatellite markers were derived from GrainGenes (<http://wheat.pw.usda.gov/ggpages/SSRclub/GeneticPhysical/>).

**Table S7.** PCR primers used for mapping the chromosomal locations of 17 gliadin genes.

| Target gene    | Sequence (5' - 3')          | T <sub>m</sub> (°C) | Amplicon size (bp) |
|----------------|-----------------------------|---------------------|--------------------|
| <i>Gli-α1</i>  | F: TCTCCTTCCAACAGCCTCTGC    | 58                  | 180                |
|                | R: GTGCAATATGGAGGGATGTAA    |                     |                    |
| <i>Gli-α4</i>  | F: CATCATTCTCATTAGTAGAG     | 58                  | 414                |
|                | R: CTGTGAAATTGGTTGTTGTGC    |                     |                    |
| <i>Gli-α5</i>  | F: TCCGGCCATCTCAGCAAAACT    | 52                  | 187                |
|                | R: CTAGAGTTATTTTCTTCTCAT    |                     |                    |
| <i>Gli-α7</i>  | F: ATTGCAGCAACACAACATAGT    | 61                  | 345                |
|                | R: CATTGCAGTAGCGTCTGTAGG    |                     |                    |
| <i>Gli-α8</i>  | F: ACCATCGAGCCAGGTCTCCTTG   | 65                  | 137                |
|                | R: TTATTTCTCGAACTGGGGCAA    |                     |                    |
| <i>Gli-α9</i>  | F: GCCTCAGCAACAATATCCATCG   | 63                  | 141                |
|                | R: GCCTCAGCAACAATATCCATCG   |                     |                    |
| <i>Gli-α10</i> | F: TCATGCTATTATTTTGCATCA    | 58                  | 287                |
|                | R: ATGGCGCAATGGTGGTTCGAGC   |                     |                    |
| <i>Gli-α11</i> | F: CATGCTATTATTTTGCATCAT    | 58                  | 276                |
|                | R: ATGGCGCAATGGTGGTTCGAGC   |                     |                    |
| <i>Gli-α16</i> | F: CAACAGCAACCACAGTATCTA    | 58                  | 410                |
|                | R: TGGAAGGAGACCTGGCTCGAC    |                     |                    |
| <i>Gli-α17</i> | F: CATTGCTGCTATTATTTTGCAT   | 58                  | 305                |
|                | R: ATGGCGCAATGGTGGTTCGAGC   |                     |                    |
| <i>Gli-α18</i> | F: TGTTGCTCATGCTATTATTAT    | 58                  | 320                |
|                | R: ATGGCGCAATGGTGGTTCGAGC   |                     |                    |
| <i>Gli-α20</i> | F: CACAACATAGCGCATGGAAGG    | 65                  | 205                |
|                | R: GCTGTTGGAAGGAGACCTGGG    |                     |                    |
| <i>Gli-α24</i> | F: AGCAAGTTCCATTGGTACAGG    | 60                  | 160                |
|                | R: TGCGAATACTGTGGTTGCGGC    |                     |                    |
| <i>Gli-α25</i> | F: ACAACAGCCATATCCGCAGCT    | 65                  | 139                |
|                | R: TGGTTGCGGTTGTGGATATGA    |                     |                    |
| <i>Gli-γ1</i>  | F: CAGATCATGCGGCCACTATTTTC  | 62                  | 167                |
|                | R: CTGGCAAATGGTGCCTTGG      |                     |                    |
| <i>Gli-γ11</i> | F: GCAACAATGTTGCCAACAACACTG | 62                  | 135                |
|                | R: AGCTGAAACAGTGGCCGCC      |                     |                    |
| <i>Gli-ω2</i>  | F: GAGTAGCGGTATAGGCATCAGG   | 58                  | 89                 |
|                | R: GAACACTCCATTGACTAAACGC   |                     |                    |

Note: F, forward primer; R, reverse primer.
